# Supplementary material for: Treatment Sequencing Patterns and Associated Direct Medical Costs of Metastatic Breast Cancer Care in the United States, 2011 to 2021
Source: PubMed Central journal article supplement (PMC9709649; doi:10.1001/jamanetworkopen.2022.44204), 2022-11-29
Supplement: jamanetwopen-e2244204-s001.pdf [file jamanetwopen-e2244204-s001.pdf]

## Supplemental Online Content

Jaber Chehayeb R, Hood A, Wang X, et al. Treatment sequencing patterns and associated direct medical costs of metastatic breast cancer care in the United States, 2011 to 2021. *JAMA Netw Open*. 2022;5(11):e2244204. doi:10.1001/jamanetworkopen.2022.44204

**eMethods.** Data Source, Excluded Drugs, Modifications to Drug Tables, Supportive Drugs, and Cost Calculations

**eAppendix.** Most Frequent Treatment Patterns, Regimen Information, and Survival Calculations

**eTable 1.** Patient Count by Subgroup for Each Line Number

**eTable 2.** Number of Drug Regimens Captured and the Corresponding Percentage of Total Drug Regimens By Subgroup and Line Number

**eTable 3.** Most Frequently Used Drug Regimens at a Line Level by Percentage as a Function of Subgroup and Line Number

**eTable 4.** Most Frequently Used Drugs at a Yearly Level by Patient Count Per Drug for Each Subgroup and Year

**eTable 5.** Percentage of Patients Receiving Supportive Drugs by Subgroup and Line Number

**eTable 6.** Annual AWP Anticancer and Supportive Drug Costs by Year After Diagnosis and Subgroup

**eTable 7.** AWP and Medicare Anticancer and Supportive Drug Costs by Line and Subgroup for the First 5 Lines of Therapy

**eTable 8.** Most Costly Drug Regimens by Subgroup and Associated Costs for Each of the First 5 Lines of Therapy

**eTable 9.** Mean and Median Medicare Costs for Patients Receiving Supportive Care by Subgroup and Year

**eTable 10.** Annual Median Medicare Anticancer Drug Costs for Patients by Year After Diagnosis and Subgroup

**eTable 11.** Drugs That Made up the 3 Largest Contributors to Overall Yearly Medicare Costs Stratified by Subgroup and Year After Diagnosis

**eTable 12.** Lines That Made up the 3 Largest Contributors to Medicare Costs by Calendar Year Stratified by Subgroup

**eTable 13.** Mean Medicare and AWP Costs by Year After Diagnosis Stratified by Year of Diagnosis

**eTable 14.** Overall Survival Statistics for the 4 Subgroups and Overall Sample

**eFigure.** Overall Survival Analysis Using Kaplan-Meier Curves by Subgroup

**eReferences.**

This supplemental material has been provided by the authors to give readers additional information about their work.

## **eMethods.** Data Source, Excluded Drugs, Modifications to Drug Tables, Supportive Drugs, and Cost Calculations

### **Data Source:**

For this study, we utilized the enhanced mBC cohort database that included patient demographics (age, race, state, gender, practice type), medication orders and administrations, line of therapy, mortality, progression events, clinic visits, vital measurements, diagnoses codes, insurance status, type of practice, and sites of metastasis

### **Subgroup Classification:**

Patients were classified as HR+ if they had any estrogen receptor positive or progesterone receptor positive tests and HER2+ if they had any HER2 test positive results (i.e., FISH positive/ amplified, NGS positive [ERBB2 amplified] or IHC positive [3+]). Patients were classified as TNBC if they were both HR- and HER2-.

**Study sample:** We excluded patients receiving any of the antineoplastic drugs listed that are not typically given for mBC treatment:

Temozolomide, bevacizumab, ponatinib, pazopanib, cytarabine, crizotinib, erlotinib, rituximab, gefitinib, afatinib, cetuximab, hydroxyurea, vorinostat, sorafenib, leucovorin, pomalidomide, lenalidomide, tretinoin, osimertinib, chlorambucil, ibrutinib, trifluridine/tipiracil, regorafenib, venetoclax, ruxolitinib, imatinib, dasatinib, lenvatinib, ixazomib, levoleucovorin, sunitinib, larotrectinib, mesna, bortezomib, cabozantinib, cobimetinib, melphalan, tazemetostat.

**Censoring:** Per Flatiron Health guidance, to consider a line of therapy completed, one of three conditions had to be met: (1) initiation of a new line of therapy, (2) death while receiving therapy, or (3) presence of a gap of >120 days between the last administration date and last visit/ structured activity date. Any patients that did not meet these criteria were censored when calculating mean line of therapy costs. No equivalent censoring was done at the yearly level.

### **Treatment Patterns:**

The following modifications were made during patient-level drug episode analysis:

- Medications for which calculated duration was zero were excluded i.e., start date and end date were identical (143 out of 31,807 drug entries).
- Some drug listings had a large discrepancy between the line of therapy duration and drug (1,009 out of 33,440 overall drugs and out of 12,831 oral drug episodes). We excluded cases with the oral drug duration below a quarter of the duration of therapy line, given the high chance of potential errors and underestimation of the true medical duration in these cases.
- For ordered non-cancelled oral drugs with no abstraction dates, duration on the drug was considered equal to the duration of other therapies in the same regimen or to the duration of the line of therapy if there were no other concurrent drugs given.
- Loading dose costs were added for drugs in which loading doses are administered in clinical practice: (trastuzumab-anns, trastuzumab-qyyp, trastuzumab-dkst, trastuzumab-dttb, trastuzumab-pkrb, pertuzumab).
- For carboplatin and paclitaxel, we calculated the percentage of total patients receiving high (once every three weeks) and low (once weekly) doses and factored those percentages in the price calculations.
- For all the filgrastim generics, we calculated the percentage of patients receiving each of high dose (480 mg) and low dose (300mg) and incorporated those percentages into cost calculations. For tbo-filgrastim, 21% of patients received low dose. For aafi-filgrastim, 25% of patients received the low dose. For sndz-filgrastim, 39% of patients received the low dose. For filgrastrim, 43% of patients received the low dose.
- We assumed all patients who received oral aprepitant received it in the tri-pack formulation

### **Supportive Drugs:**

- To estimate the cost of supportive care drugs, we identified all non-cancelled medication orders/medication administrations and removed anti-cancer drugs and drugs generally unrelated to cancer care or to the management of adverse effects of cancer therapies. The remaining drugs (non-endocrine or anti-neoplastic) fell into 16 broad categories: steroid, antiemetic, hematological agent, proton pump inhibitor, antidepressant, antidote and reversal agent, solution-fluid, bone therapy agent, pain agent, anesthetic, anticholinergic, gout, and hyperuricemia agent, cytoprotective, anti-infective, antihyperglycemic, sedative agent.
- Anti-coagulants and anti-platelets were not included in supportive drug calculations.
- The supportive drugs that were included in cost calculations are dexrazoxane, pegfilgrastim (Neulasta) and generics, palonosetron, aprepitant, fosaprepitant, filgrastim (Neopogen) and generics, granisetron (including Sustol and Sancuso), rolapitant, netupitant/palonosetron HCl, and fosnetupitant/palonosetron HCl. The pegfilgrastim generics we considered are Fulphila, Nyvepria, Udenyca, and Ziextenzo.
- The filgrastim generics we considered are Granix, Nivestym and Zarxio.

#### **Cost calculations:**

- We used 2021 AWP pricing as a stand-in for Medicare part D pricing for tucatinib since the drug was not approved yet in 2019.
- We used standard oral drug frequencies for cost calculation purposes. We considered neratinib, letrozole, talazoparib, anastrozole, everolimus, tamoxifen, lapatinib, alpelisib, and exemstane to be taken once daily, continuously, and olaparib, abemaciclib, and tucatinib to be taken twice daily, continuously. We considered capecitabine to be taken twice daily, two weeks on and one week off, and palbociclib and ribociclib to be taken once daily, three weeks on and one week off.

#### **Survival Analysis**

To validate our data, we performed a survival analysis to examine whether the overall survival of the patients included in our dataset followed the survival trends in the published literature. We performed this analysis following Flatiron Health methodology guidance and estimated survival for the overall cohort and for each of the 4 mBC subgroups. Patients who were still alive were censored at their last structured activity date (i.e., visit or medication order/ administration). The analyses were performed using R software and packages ‘Survival’ and ‘survminer.’

## **eAppendix. Most Frequent Treatment Patterns, Regimen Information, and Survival Calculations**

We differentiated between two dosing strategies for paclitaxel and carboplatin that are associated with different costs. We calculated that 24% of patients received high dose paclitaxel once every 3 weeks while 76 % received low dose paclitaxel once per week. For carboplatin, 60% of patients received high doses every three weeks whereas 40% of patients received a low dose once a week.

Among patients with HR+HER2- mBC, the most frequent first line therapy was anastrozole (14.52%) and second line therapy was fulvestrant (10.62%). Capecitabine was the most frequently used drug in the third therapy line (9.62%), fourth therapy line (11.06%), and fifth therapy line (9.20%). Among patients with HR+HER2+ mBC, the most frequent first line therapy was the drug regimen consisting of docetaxel, pertuzumab, trastuzumab (12.60%). Ado-trastuzumab emtansine was the most frequent drug for therapy lines 2 through 5, making up 8.80% of second line regimens, 9.61 % of third line regimens, 9.06% of fourth line regimens and 8.51% of fifth line regimens. Among patients with HR-HER2+ mBC, the most frequent first line regimen was docetaxel, pertuzumab, and trastuzumab (18.20%). Ado-trastuzumab emtansine was the most frequent second (32.92 %), third (16.36%) and fourth (12.39%) line of therapy (eTable3). Further, the drug regimen consisting of doxorubicin, pegylated and liposomal was the most common fifth therapy line (8.06%). Among patients with TNBC, capecitabine was the most frequent first (19.01%) and second line therapy (13.94%), while eribulin was the most frequent third (18.53%), fourth (14.65%) and fifth line of therapy (10.98%).

eTable 4 shows the five most frequently received individual drugs by year since date of metastatic diagnosis, as defined by highest patient count per year and subgroup. For year 1, the most frequently used drugs are palbociclib (n=3362 patients, HR+HER2-), trastuzumab (n=1595 patients, HR+HER2+ and n=566 patients, HR-HER2+ and capecitabine (n=448 patients, TNBC).

**Survival calculations:** Patients with HR+HER2+ mBC had the highest median survival (37.6 months), followed by patients with HR+HER2- mBC (32.3 months), patients with HR-HER2+ mBC (20.9 months), and patients with TNBC (10.44 months; eTable 12, eFigure 1). These overall survival times agree with estimates from the literature sample, albeit trending slightly lower<sup>1-7</sup>.

**eTable 1.** Patient Count by Subgroup for Each Line Number

| Subgroup         | Line of Therapy Number |      |      |      |      |      |     |     |     |     |    |    |    |    |    |    |    |    |           |
|------------------|------------------------|------|------|------|------|------|-----|-----|-----|-----|----|----|----|----|----|----|----|----|-----------|
|                  | 1                      | 2    | 3    | 4    | 5    | 6    | 7   | 8   | 9   | 10  | 11 | 12 | 13 | 14 | 15 | 16 | 17 | 18 | % with >5 |
| <b>TNBC</b>      | 1457                   | 775  | 394  | 198  | 82   | 37   | 17  | 8   | 4   | 2   | 0  | 0  | 0  | 0  | 0  | 0  | 0  | 0  | 2.5       |
| <b>HER2+/HR-</b> | 802                    | 407  | 220  | 113  | 62   | 44   | 24  | 10  | 4   | 3   | 0  | 0  | 0  | 0  | 0  | 0  | 0  | 0  | 5.5       |
| <b>HER2+/HR+</b> | 2785                   | 2034 | 1332 | 861  | 552  | 349  | 226 | 133 | 76  | 37  | 19 | 7  | 3  | 1  | 1  | 0  | 0  | 0  | 12.5      |
| <b>HER2-/HR+</b> | 10171                  | 6546 | 4179 | 2640 | 1676 | 1046 | 639 | 382 | 204 | 101 | 58 | 27 | 14 | 6  | 2  | 2  | 1  | 1  | 10.3      |

\*Given that receiving at least one line of therapy was among our inclusion criteria, the number receiving LOT#1 is equal to the total number of patients in that subset.

**eTable 2.** Number of Drug Regimens Captured and the Corresponding Percentage of Total Drug Regimens By Subgroup and Line Number

| Subgroup | Line Number | Total Percent Covered (%) | Number of Regimens |
|----------|-------------|---------------------------|--------------------|
| HR+HER2- | 1           | 80.8                      | 47                 |
| HR+HER2- | 2           | 72.4                      | 49                 |
| HR+HER2- | 3           | 70.6                      | 50                 |
| HR+HER2- | 4           | 67.6                      | 28                 |
| HR+HER2- | 5           | 69.2                      | 37                 |
| HR+HER2+ | 1           | 72.9                      | 71                 |
| HR+HER2+ | 2           | 58.8                      | 93                 |
| HR+HER2+ | 3           | 58.9                      | 81                 |
| HR+HER2+ | 4           | 55.1                      | 72                 |
| HR+HER2+ | 5           | 50.7                      | 47                 |
| HR-HER2+ | 1           | 80.5                      | 69                 |
| HR-HER2+ | 2           | 74.4                      | 44                 |
| HR-HER2+ | 3           | 83.6                      | 74                 |
| HR-HER2+ | 4           | 100                       | 105                |
| HR-HER2+ | 5           | 100                       | 77                 |
| TNBC     | 1           | 85.2                      | 31                 |
| TNBC     | 2           | 80.5                      | 29                 |
| TNBC     | 3           | 84.5                      | 30                 |
| TNBC     | 4           | 80.8                      | 22                 |
| TNBC     | 5           | 100                       | 46                 |

\*We filtered out all drug combinations that less than 0.75% of patients in a subgroup received for a particular line.

**eTable 3.** Most Frequently Used Drug Regimens at a Line Level by Percentage as a Function of Subgroup and Line Number

| Subgroup | LineName                     | Percent (%) | Line Number |
|----------|------------------------------|-------------|-------------|
| HR+HER2- | Anastrozole                  | 14.52       | 1           |
| HR+HER2- | Letrozole                    | 12.05       | 1           |
| HR+HER2- | Letrozole, Palbociclib       | 12.05       | 1           |
| HR+HER2- | Fulvestrant                  | 6.79        | 1           |
| HR+HER2- | Fulvestrant, Palbociclib     | 6.53        | 1           |
| HR+HER2- | Tamoxifen                    | 5.78        | 1           |
| HR+HER2- | Exemestane                   | 3.88        | 1           |
| HR+HER2- | Capecitabine                 | 3.25        | 1           |
| HR+HER2- | Cyclophosphamide,Doxorubicin | 3.06        | 1           |
| HR+HER2- | Paclitaxel Protein-Bound     | 2.48        | 1           |
| HR+HER2- | Paclitaxel                   | 2.24        | 1           |
| HR+HER2- | Anastrozole,Palbociclib      | 1.75        | 1           |
| HR+HER2- | Letrozole,Ribociclib         | 1.37        | 1           |
| HR+HER2- | Cyclophosphamide,Docetaxel   | 1.3         | 1           |
| HR+HER2- | Carboplatin,Gemcitabine      | 1.04        | 1           |
| HR+HER2- | Fulvestrant                  | 10.62       | 2           |
| HR+HER2- | Fulvestrant,Palbociclib      | 9.49        | 2           |
| HR+HER2- | Letrozole,Palbociclib        | 7.32        | 2           |
| HR+HER2- | Capecitabine                 | 6.31        | 2           |
| HR+HER2- | Everolimus,Exemestane        | 4.63        | 2           |
| HR+HER2- | Paclitaxel                   | 4.51        | 2           |
| HR+HER2- | Letrozole                    | 3.54        | 2           |
| HR+HER2- | Exemestane                   | 3.44        | 2           |
| HR+HER2- | Anastrozole                  | 3.07        | 2           |
| HR+HER2- | Tamoxifen                    | 2.86        | 2           |
| HR+HER2- | Paclitaxel Protein-Bound     | 2.52        | 2           |
| HR+HER2- | Anastrozole,Fulvestrant      | 1.88        | 2           |
| HR+HER2- | Abemaciclib,Fulvestrant      | 1.57        | 2           |
| HR+HER2- | Carboplatin,Gemcitabine      | 1.54        | 2           |
| HR+HER2- | Eribulin                     | 1.53        | 2           |
| HR+HER2- | Gemcitabine                  | 1.42        | 2           |
| HR+HER2- | Fulvestrant,Letrozole        | 1.41        | 2           |
| HR+HER2- | Anastrozole,Palbociclib      | 1.39        | 2           |
| HR+HER2- | Capecitabine                 | 9.62        | 3           |

| Subgroup | LineName                        | Percent (%) | Line Number |
|----------|---------------------------------|-------------|-------------|
| HR+HER2- | Fulvestrant,Palbociclib         | 7.23        | 3           |
| HR+HER2- | Everolimus,Exemestane           | 6.39        | 3           |
| HR+HER2- | Fulvestrant                     | 6.1         | 3           |
| HR+HER2- | Letrozole,Palbociclib           | 4.16        | 3           |
| HR+HER2- | Eribulin                        | 3.95        | 3           |
| HR+HER2- | Paclitaxel Protein-Bound        | 3.66        | 3           |
| HR+HER2- | Paclitaxel                      | 2.92        | 3           |
| HR+HER2- | Tamoxifen                       | 2.92        | 3           |
| HR+HER2- | Letrozole                       | 2.9         | 3           |
| HR+HER2- | Gemcitabine                     | 2.8         | 3           |
| HR+HER2- | Exemestane                      | 2.68        | 3           |
| HR+HER2- | Anastrozole                     | 2.58        | 3           |
| HR+HER2- | Doxorubicin Pegylated Liposomal | 1.7         | 3           |
| HR+HER2- | Alpelisib,Fulvestrant           | 1.68        | 3           |
| HR+HER2- | Abemaciclib,Fulvestrant         | 1.63        | 3           |
| HR+HER2- | Carboplatin,Gemcitabine         | 1.58        | 3           |
| HR+HER2- | Vinorelbine                     | 1.1         | 3           |
| HR+HER2- | Capecitabine                    | 11.06       | 4           |
| HR+HER2- | Eribulin                        | 6.63        | 4           |
| HR+HER2- | Everolimus,Exemestane           | 5.76        | 4           |
| HR+HER2- | Fulvestrant,Palbociclib         | 5.64        | 4           |
| HR+HER2- | Paclitaxel Protein-Bound        | 5.53        | 4           |
| HR+HER2- | Fulvestrant                     | 4.39        | 4           |
| HR+HER2- | Gemcitabine                     | 3.86        | 4           |
| HR+HER2- | Letrozole,Palbociclib           | 3.56        | 4           |
| HR+HER2- | Paclitaxel                      | 3.52        | 4           |
| HR+HER2- | Doxorubicin Pegylated Liposomal | 3.03        | 4           |
| HR+HER2- | Vinorelbine                     | 2.01        | 4           |
| HR+HER2- | Tamoxifen                       | 1.97        | 4           |
| HR+HER2- | Exemestane                      | 1.74        | 4           |
| HR+HER2- | Carboplatin,Gemcitabine         | 1.59        | 4           |
| HR+HER2- | Alpelisib,Fulvestrant           | 1.29        | 4           |
| HR+HER2- | Anastrozole                     | 1.29        | 4           |
| HR+HER2- | Capecitabine,Fulvestrant        | 1.25        | 4           |
| HR+HER2- | Abemaciclib,Fulvestrant         | 1.21        | 4           |



| Subgroup | LineName                                     | Percent (%) | Line Number |
|----------|----------------------------------------------|-------------|-------------|
| HR+HER2- | Letrozole                                    | 1.17        | 4           |
| HR+HER2- | Docetaxel                                    | 1.06        | 4           |
| HR+HER2- | Capecitabine                                 | 9.19        | 5           |
| HR+HER2- | Eribulin                                     | 7.52        | 5           |
| HR+HER2- | Gemcitabine                                  | 7.34        | 5           |
| HR+HER2- | Paclitaxel Protein-Bound                     | 4.65        | 5           |
| HR+HER2- | Everolimus,Exemestane                        | 4.36        | 5           |
| HR+HER2- | Paclitaxel                                   | 4.3         | 5           |
| HR+HER2- | Fulvestrant,Palbociclib                      | 3.82        | 5           |
| HR+HER2- | Doxorubicin Pegylated Liposomal              | 3.7         | 5           |
| HR+HER2- | Vinorelbine                                  | 3.04        | 5           |
| HR+HER2- | Letrozole,Palbociclib                        | 2.74        | 5           |
| HR+HER2- | Fulvestrant                                  | 2.68        | 5           |
| HR+HER2- | Carboplatin,Gemcitabine                      | 2.09        | 5           |
| HR+HER2- | Alpelisib,Fulvestrant                        | 1.67        | 5           |
| HR+HER2- | Docetaxel                                    | 1.25        | 5           |
| HR+HER2- | Tamoxifen                                    | 1.19        | 5           |
| HR+HER2- | Abemaciclib,Fulvestrant                      | 1.13        | 5           |
| HR+HER2- | Cyclophosphamide,Doxorubicin                 | 1.13        | 5           |
| HR+HER2- | Exemestane                                   | 1.01        | 5           |
| HR+HER2- | Ixabepilone                                  | 1.01        | 5           |
| HR-HER2+ | Docetaxel,Pertuzumab,Trastuzumab             | 18.2        | 1           |
| HR-HER2+ | Ado-Trastuzumab Emtansine                    | 8.1         | 1           |
| HR-HER2+ | Paclitaxel,Pertuzumab,Trastuzumab            | 7.73        | 1           |
| HR-HER2+ | Trastuzumab                                  | 6.23        | 1           |
| HR-HER2+ | Carboplatin,Docetaxel,Pertuzumab,Trastuzumab | 5.74        | 1           |
| HR-HER2+ | Paclitaxel,Trastuzumab                       | 4.61        | 1           |
| HR-HER2+ | Capecitabine,Lapatinib                       | 4.11        | 1           |
| HR-HER2+ | Carboplatin,Docetaxel,Trastuzumab            | 3.62        | 1           |
| HR-HER2+ | Capecitabine                                 | 3.49        | 1           |
| HR-HER2+ | Pertuzumab,Trastuzumab                       | 3.12        | 1           |
| HR-HER2+ | Docetaxel,Pertuzumab,Trastuzumab-Anns        | 2.87        | 1           |
| HR-HER2+ | Cyclophosphamide,Doxorubicin                 | 1.75        | 1           |
| HR-HER2+ | Trastuzumab,Vinorelbine                      | 1.75        | 1           |
| HR-HER2+ | Docetaxel,Paclitaxel,Pertuzumab,Trastuzumab  | 1.37        | 1           |

| Subgroup | LineName                                | Percent (%) | Line Number |
|----------|-----------------------------------------|-------------|-------------|
| HR-HER2+ | Lapatinib                               | 1.12        | 1           |
| HR-HER2+ | Paclitaxel                              | 1.12        | 1           |
| HR-HER2+ | Paclitaxel Protein-Bound,Trastuzumab    | 1.12        | 1           |
| HR-HER2+ | Carboplatin,Gemcitabine                 | 1           | 1           |
| HR-HER2+ | Ado-Trastuzumab Emtansine               | 32.92       | 2           |
| HR-HER2+ | Capecitabine,Lapatinib                  | 4.91        | 2           |
| HR-HER2+ | Docetaxel,Pertuzumab,Trastuzumab        | 3.44        | 2           |
| HR-HER2+ | Trastuzumab,Vinorelbine                 | 2.95        | 2           |
| HR-HER2+ | Capecitabine                            | 2.7         | 2           |
| HR-HER2+ | Eribulin                                | 2.7         | 2           |
| HR-HER2+ | Lapatinib,Trastuzumab                   | 2.7         | 2           |
| HR-HER2+ | Pertuzumab,Trastuzumab                  | 2.7         | 2           |
| HR-HER2+ | Paclitaxel,Pertuzumab,Trastuzumab       | 2.46        | 2           |
| HR-HER2+ | Capecitabine,Trastuzumab                | 2.21        | 2           |
| HR-HER2+ | Paclitaxel,Trastuzumab                  | 1.97        | 2           |
| HR-HER2+ | Pertuzumab,Trastuzumab,Vinorelbine      | 1.72        | 2           |
| HR-HER2+ | Trastuzumab                             | 1.72        | 2           |
| HR-HER2+ | Capecitabine,Lapatinib,Trastuzumab      | 1.47        | 2           |
| HR-HER2+ | Cyclophosphamide,Doxorubicin            | 1.47        | 2           |
| HR-HER2+ | Capecitabine,Trastuzumab-Anns,Tucatinib | 1.23        | 2           |
| HR-HER2+ | Gemcitabine                             | 1.23        | 2           |
| HR-HER2+ | Ado-Trastuzumab Emtansine               | 16.36       | 3           |
| HR-HER2+ | Capecitabine,Lapatinib                  | 6.36        | 3           |
| HR-HER2+ | Fam-Trastuzumab Deruxtecan-Nxki         | 5.45        | 3           |
| HR-HER2+ | Capecitabine                            | 4.09        | 3           |
| HR-HER2+ | Eribulin                                | 3.64        | 3           |
| HR-HER2+ | Gemcitabine,Trastuzumab                 | 3.64        | 3           |
| HR-HER2+ | Docetaxel,Pertuzumab,Trastuzumab        | 2.73        | 3           |
| HR-HER2+ | Lapatinib,Trastuzumab                   | 2.73        | 3           |
| HR-HER2+ | Capecitabine,Trastuzumab                | 2.27        | 3           |
| HR-HER2+ | Eribulin,Trastuzumab                    | 2.27        | 3           |
| HR-HER2+ | Paclitaxel,Pertuzumab,Trastuzumab       | 2.27        | 3           |
| HR-HER2+ | Trastuzumab                             | 2.27        | 3           |
| HR-HER2+ | Capecitabine,Neratinib                  | 1.82        | 3           |
| HR-HER2+ | Capecitabine,Trastuzumab-Anns,Tucatinib | 1.82        | 3           |

| Subgroup | LineName                                | Percent (%) | Line Number |
|----------|-----------------------------------------|-------------|-------------|
| HR-HER2+ | Lapatinib                               | 1.82        | 3           |
| HR-HER2+ | Paclitaxel Protein-Bound                | 1.82        | 3           |
| HR-HER2+ | Paclitaxel Protein-Bound,Trastuzumab    | 1.82        | 3           |
| HR-HER2+ | Trastuzumab,Vinorelbine                 | 1.82        | 3           |
| HR-HER2+ | Capecitabine,Pertuzumab,Trastuzumab     | 1.36        | 3           |
| HR-HER2+ | Cyclophosphamide,Doxorubicin            | 1.36        | 3           |
| HR-HER2+ | Doxorubicin Pegylated Liposomal         | 1.36        | 3           |
| HR-HER2+ | Pertuzumab,Trastuzumab                  | 1.36        | 3           |
| HR-HER2+ | Pertuzumab,Trastuzumab,Vinorelbine      | 1.36        | 3           |
| HR-HER2+ | Ado-Trastuzumab Emtansine               | 12.39       | 4           |
| HR-HER2+ | Capecitabine,Lapatinib                  | 7.08        | 4           |
| HR-HER2+ | Eribulin                                | 5.31        | 4           |
| HR-HER2+ | Fam-Trastuzumab Deruxtecan-Nxki         | 5.31        | 4           |
| HR-HER2+ | Trastuzumab,Vinorelbine                 | 4.42        | 4           |
| HR-HER2+ | Capecitabine,Trastuzumab-Anns,Tucatinib | 3.54        | 4           |
| HR-HER2+ | Doxorubicin Pegylated Liposomal         | 3.54        | 4           |
| HR-HER2+ | Gemcitabine,Trastuzumab                 | 3.54        | 4           |
| HR-HER2+ | Gemcitabine                             | 2.65        | 4           |
| HR-HER2+ | Pertuzumab,Trastuzumab,Vinorelbine      | 2.65        | 4           |
| HR-HER2+ | Vinorelbine                             | 2.65        | 4           |
| HR-HER2+ | Capecitabine                            | 1.77        | 4           |
| HR-HER2+ | Capecitabine,Trastuzumab                | 1.77        | 4           |
| HR-HER2+ | Capecitabine,Trastuzumab,Tucatinib      | 1.77        | 4           |
| HR-HER2+ | Docetaxel,Pertuzumab,Trastuzumab        | 1.77        | 4           |
| HR-HER2+ | Eribulin,Trastuzumab                    | 1.77        | 4           |
| HR-HER2+ | Gemcitabine,Pertuzumab,Trastuzumab      | 1.77        | 4           |
| HR-HER2+ | Ixabepilone                             | 1.77        | 4           |
| HR-HER2+ | Lapatinib                               | 1.77        | 4           |
| HR-HER2+ | Lapatinib,Trastuzumab                   | 1.77        | 4           |
| HR-HER2+ | Sacituzumab Govitecan-Hziy              | 1.77        | 4           |
| HR-HER2+ | Trastuzumab                             | 1.77        | 4           |
| HR-HER2+ | Doxorubicin Pegylated Liposomal         | 8.06        | 5           |
| HR-HER2+ | Ado-Trastuzumab Emtansine               | 6.45        | 5           |
| HR-HER2+ | Capecitabine,Trastuzumab                | 6.45        | 5           |
| HR-HER2+ | Fam-Trastuzumab Deruxtecan-Nxki         | 6.45        | 5           |

| Subgroup | LineName                                                | Percent (%) | Line Number |
|----------|---------------------------------------------------------|-------------|-------------|
| HR-HER2+ | Trastuzumab,Vinorelbine                                 | 6.45        | 5           |
| HR-HER2+ | Capecitabine,Lapatinib                                  | 3.23        | 5           |
| HR-HER2+ | Gemcitabine                                             | 3.23        | 5           |
| HR-HER2+ | Gemcitabine,Trastuzumab                                 | 3.23        | 5           |
| HR-HER2+ | Ado-Trastuzumab Emtansine,Anastrozole                   | 1.61        | 5           |
| HR-HER2+ | Atezolizumab,Paclitaxel Protein-Bound                   | 1.61        | 5           |
| HR-HER2+ | Bevacizumab,Capecitabine,Trastuzumab                    | 1.61        | 5           |
| HR-HER2+ | Bevacizumab,Doxorubicin Pegylated Liposomal             | 1.61        | 5           |
| HR-HER2+ | Capecitabine                                            | 1.61        | 5           |
| HR-HER2+ | Capecitabine,Ixabepilone,Lapatinib,Trastuzumab          | 1.61        | 5           |
| HR-HER2+ | Capecitabine,Lapatinib,Trastuzumab                      | 1.61        | 5           |
| HR-HER2+ | Carboplatin,Fam-Trastuzumab Deruxtecan-Nxki,Gemcitabine | 1.61        | 5           |
| HR-HER2+ | Cyclophosphamide,Docetaxel                              | 1.61        | 5           |
| HR-HER2+ | Cyclophosphamide,Doxorubicin                            | 1.61        | 5           |
| HR-HER2+ | Docetaxel,Trastuzumab                                   | 1.61        | 5           |
| HR-HER2+ | Doxorubicin                                             | 1.61        | 5           |
| HR-HER2+ | Doxorubicin Pegylated Liposomal,Lapatinib,Trastuzumab   | 1.61        | 5           |
| HR-HER2+ | Eribulin                                                | 1.61        | 5           |
| HR-HER2+ | Eribulin,Trastuzumab                                    | 1.61        | 5           |
| HR-HER2+ | Eribulin,Trastuzumab-Anns                               | 1.61        | 5           |
| HR-HER2+ | Fam-Trastuzumab Deruxtecan-Nxki,Trastuzumab             | 1.61        | 5           |
| HR-HER2+ | Fluorouracil,Lapatinib,Methotrexate,Trastuzumab         | 1.61        | 5           |
| HR-HER2+ | Gemcitabine,Margetuximab-Cmkb                           | 1.61        | 5           |
| HR-HER2+ | Gemcitabine,Nivolumab                                   | 1.61        | 5           |
| HR-HER2+ | Gemcitabine,Paclitaxel Protein-Bound,Trastuzumab        | 1.61        | 5           |
| HR-HER2+ | Ixabepilone                                             | 1.61        | 5           |
| HR-HER2+ | Lapatinib                                               | 1.61        | 5           |
| HR-HER2+ | Lapatinib,Methotrexate,Trastuzumab                      | 1.61        | 5           |
| HR-HER2+ | Lapatinib,Trastuzumab                                   | 1.61        | 5           |
| HR-HER2+ | Methotrexate                                            | 1.61        | 5           |
| HR-HER2+ | Methotrexate,Trastuzumab,Vinorelbine                    | 1.61        | 5           |
| HR-HER2+ | Neratinib                                               | 1.61        | 5           |
| HR-HER2+ | Paclitaxel Protein-Bound,Pertuzumab,Trastuzumab         | 1.61        | 5           |
| HR-HER2+ | Paclitaxel Protein-Bound,Trastuzumab                    | 1.61        | 5           |
| HR-HER2+ | Pembrolizumab                                           | 1.61        | 5           |

| Subgroup | LineName                                     | Percent (%) | Line Number |
|----------|----------------------------------------------|-------------|-------------|
| HR-HER2+ | Trastuzumab                                  | 1.61        | 5           |
| HR-HER2+ | Trastuzumab-Anns                             | 1.61        | 5           |
| HR-HER2+ | Vinorelbine                                  | 1.61        | 5           |
| HR+HER2+ | Docetaxel,Pertuzumab,Trastuzumab             | 12.6        | 1           |
| HR+HER2+ | Anastrozole                                  | 9.34        | 1           |
| HR+HER2+ | Letrozole                                    | 7.94        | 1           |
| HR+HER2+ | Paclitaxel,Pertuzumab,Trastuzumab            | 5.1         | 1           |
| HR+HER2+ | Tamoxifen                                    | 5.03        | 1           |
| HR+HER2+ | Carboplatin,Docetaxel,Pertuzumab,Trastuzumab | 3.84        | 1           |
| HR+HER2+ | Letrozole,Palbociclib                        | 3.09        | 1           |
| HR+HER2+ | Fulvestrant                                  | 2.76        | 1           |
| HR+HER2+ | Ado-Trastuzumab Emtansine                    | 2.69        | 1           |
| HR+HER2+ | Exemestane                                   | 2.26        | 1           |
| HR+HER2+ | Fulvestrant,Palbociclib                      | 2.23        | 1           |
| HR+HER2+ | Trastuzumab                                  | 1.87        | 1           |
| HR+HER2+ | Cyclophosphamide,Doxorubicin                 | 1.76        | 1           |
| HR+HER2+ | Anastrozole,Trastuzumab                      | 1.44        | 1           |
| HR+HER2+ | Letrozole,Trastuzumab                        | 1.4         | 1           |
| HR+HER2+ | Capecitabine                                 | 1.36        | 1           |
| HR+HER2+ | Carboplatin,Docetaxel,Trastuzumab            | 1.33        | 1           |
| HR+HER2+ | Pertuzumab,Trastuzumab                       | 1.29        | 1           |
| HR+HER2+ | Capecitabine,Lapatinib                       | 1.11        | 1           |
| HR+HER2+ | Paclitaxel,Trastuzumab                       | 1.08        | 1           |
| HR+HER2+ | Paclitaxel                                   | 1.04        | 1           |
| HR+HER2+ | Ado-Trastuzumab Emtansine                    | 8.8         | 2           |
| HR+HER2+ | Anastrozole,Trastuzumab                      | 3.74        | 2           |
| HR+HER2+ | Anastrozole,Pertuzumab,Trastuzumab           | 3.59        | 2           |
| HR+HER2+ | Letrozole,Pertuzumab,Trastuzumab             | 3           | 2           |
| HR+HER2+ | Docetaxel,Pertuzumab,Trastuzumab             | 2.9         | 2           |
| HR+HER2+ | Fulvestrant                                  | 2.85        | 2           |
| HR+HER2+ | Letrozole,Trastuzumab                        | 2.56        | 2           |
| HR+HER2+ | Capecitabine                                 | 2.31        | 2           |
| HR+HER2+ | Fulvestrant,Palbociclib                      | 2.11        | 2           |
| HR+HER2+ | Letrozole                                    | 2.02        | 2           |
| HR+HER2+ | Anastrozole                                  | 1.97        | 2           |

| Subgroup | LineName                              | Percent (%) | Line Number |
|----------|---------------------------------------|-------------|-------------|
| HR+HER2+ | Pertuzumab,Tamoxifen,Trastuzumab      | 1.97        | 2           |
| HR+HER2+ | Exemestane                            | 1.92        | 2           |
| HR+HER2+ | Paclitaxel,Pertuzumab,Trastuzumab     | 1.87        | 2           |
| HR+HER2+ | Tamoxifen                             | 1.77        | 2           |
| HR+HER2+ | Letrozole,Palbociclib                 | 1.57        | 2           |
| HR+HER2+ | Fulvestrant,Trastuzumab               | 1.47        | 2           |
| HR+HER2+ | Capecitabine,Lapatinib                | 1.38        | 2           |
| HR+HER2+ | Exemestane,Trastuzumab                | 1.38        | 2           |
| HR+HER2+ | Tamoxifen,Trastuzumab                 | 1.28        | 2           |
| HR+HER2+ | Everolimus,Exemestane                 | 1.23        | 2           |
| HR+HER2+ | Paclitaxel                            | 1.13        | 2           |
| HR+HER2+ | Ado-Trastuzumab Emtansine             | 9.61        | 3           |
| HR+HER2+ | Capecitabine                          | 3.3         | 3           |
| HR+HER2+ | Fulvestrant,Palbociclib               | 2.7         | 3           |
| HR+HER2+ | Docetaxel,Pertuzumab,Trastuzumab      | 2.48        | 3           |
| HR+HER2+ | Letrozole,Pertuzumab,Trastuzumab      | 2.33        | 3           |
| HR+HER2+ | Ado-Trastuzumab Emtansine,Anastrozole | 2.25        | 3           |
| HR+HER2+ | Fulvestrant                           | 2.1         | 3           |
| HR+HER2+ | Capecitabine,Lapatinib                | 1.95        | 3           |
| HR+HER2+ | Anastrozole,Pertuzumab,Trastuzumab    | 1.8         | 3           |
| HR+HER2+ | Eribulin                              | 1.73        | 3           |
| HR+HER2+ | Exemestane                            | 1.73        | 3           |
| HR+HER2+ | Letrozole,Palbociclib                 | 1.73        | 3           |
| HR+HER2+ | Everolimus,Exemestane                 | 1.58        | 3           |
| HR+HER2+ | Fulvestrant,Trastuzumab               | 1.58        | 3           |
| HR+HER2+ | Letrozole,Trastuzumab                 | 1.5         | 3           |
| HR+HER2+ | Ado-Trastuzumab Emtansine,Letrozole   | 1.43        | 3           |
| HR+HER2+ | Trastuzumab,Vinorelbine               | 1.43        | 3           |
| HR+HER2+ | Letrozole                             | 1.28        | 3           |
| HR+HER2+ | Tamoxifen                             | 1.28        | 3           |
| HR+HER2+ | Exemestane,Pertuzumab,Trastuzumab     | 1.2         | 3           |
| HR+HER2+ | Fulvestrant,Pertuzumab,Trastuzumab    | 1.2         | 3           |
| HR+HER2+ | Anastrozole                           | 1.13        | 3           |
| HR+HER2+ | Paclitaxel,Pertuzumab,Trastuzumab     | 1.13        | 3           |
| HR+HER2+ | Tamoxifen,Trastuzumab                 | 1.13        | 3           |

| Subgroup | LineName                              | Percent (%) | Line Number |
|----------|---------------------------------------|-------------|-------------|
| HR+HER2+ | Ado-Trastuzumab Emtansine,Tamoxifen   | 1.05        | 3           |
| HR+HER2+ | Anastrozole,Trastuzumab               | 1.05        | 3           |
| HR+HER2+ | Fam-Trastuzumab Deruxtecan-Nxki       | 1.05        | 3           |
| HR+HER2+ | Ado-Trastuzumab Emtansine             | 9.06        | 4           |
| HR+HER2+ | Capecitabine                          | 3.72        | 4           |
| HR+HER2+ | Capecitabine,Lapatinib                | 3.6         | 4           |
| HR+HER2+ | Fulvestrant                           | 2.44        | 4           |
| HR+HER2+ | Eribulin                              | 2.32        | 4           |
| HR+HER2+ | Fulvestrant,Palbociclib               | 2.21        | 4           |
| HR+HER2+ | Docetaxel,Pertuzumab,Trastuzumab      | 1.74        | 4           |
| HR+HER2+ | Fam-Trastuzumab Deruxtecan-Nxki       | 1.74        | 4           |
| HR+HER2+ | Ado-Trastuzumab Emtansine,Fulvestrant | 1.51        | 4           |
| HR+HER2+ | Letrozole,Palbociclib                 | 1.51        | 4           |
| HR+HER2+ | Trastuzumab,Vinorelbine               | 1.51        | 4           |
| HR+HER2+ | Capecitabine,Trastuzumab              | 1.39        | 4           |
| HR+HER2+ | Ado-Trastuzumab Emtansine,Letrozole   | 1.28        | 4           |
| HR+HER2+ | Anastrozole,Pertuzumab,Trastuzumab    | 1.28        | 4           |
| HR+HER2+ | Paclitaxel Protein-Bound              | 1.28        | 4           |
| HR+HER2+ | Ado-Trastuzumab Emtansine,Anastrozole | 1.16        | 4           |
| HR+HER2+ | Everolimus,Exemestane                 | 1.16        | 4           |
| HR+HER2+ | Fulvestrant,Pertuzumab,Trastuzumab    | 1.16        | 4           |
| HR+HER2+ | Gemcitabine,Trastuzumab               | 1.16        | 4           |
| HR+HER2+ | Tamoxifen                             | 1.16        | 4           |
| HR+HER2+ | Anastrozole,Trastuzumab               | 1.05        | 4           |
| HR+HER2+ | Gemcitabine                           | 1.05        | 4           |
| HR+HER2+ | Paclitaxel,Pertuzumab,Trastuzumab     | 1.05        | 4           |
| HR+HER2+ | Ado-Trastuzumab Emtansine             | 8.51        | 5           |
| HR+HER2+ | Capecitabine,Lapatinib                | 3.8         | 5           |
| HR+HER2+ | Capecitabine                          | 3.62        | 5           |
| HR+HER2+ | Fam-Trastuzumab Deruxtecan-Nxki       | 3.44        | 5           |
| HR+HER2+ | Fulvestrant,Palbociclib               | 2.54        | 5           |
| HR+HER2+ | Everolimus,Exemestane                 | 2.17        | 5           |
| HR+HER2+ | Docetaxel,Pertuzumab,Trastuzumab      | 1.99        | 5           |
| HR+HER2+ | Eribulin                              | 1.81        | 5           |
| HR+HER2+ | Gemcitabine,Trastuzumab               | 1.81        | 5           |

| Subgroup | LineName                               | Percent (%) | Line Number |
|----------|----------------------------------------|-------------|-------------|
| HR+HER2+ | Capecitabine,Trastuzumab               | 1.63        | 5           |
| HR+HER2+ | Ado-Trastuzumab Emtansine,Exemestane   | 1.45        | 5           |
| HR+HER2+ | Exemestane                             | 1.45        | 5           |
| HR+HER2+ | Fulvestrant                            | 1.45        | 5           |
| HR+HER2+ | Fulvestrant,Trastuzumab                | 1.45        | 5           |
| HR+HER2+ | Gemcitabine                            | 1.45        | 5           |
| HR+HER2+ | Paclitaxel Protein-Bound               | 1.45        | 5           |
| HR+HER2+ | Eribulin,Trastuzumab                   | 1.27        | 5           |
| HR+HER2+ | Lapatinib,Trastuzumab                  | 1.09        | 5           |
| HR+HER2+ | Paclitaxel                             | 1.09        | 5           |
| TNBC     | Capecitabine                           | 19.01       | 1           |
| TNBC     | Carboplatin,Gemcitabine                | 9.13        | 1           |
| TNBC     | Cyclophosphamide,Doxorubicin           | 9.06        | 1           |
| TNBC     | Paclitaxel Protein-Bound               | 7.76        | 1           |
| TNBC     | Paclitaxel                             | 7.62        | 1           |
| TNBC     | Atezolizumab,Paclitaxel Protein-Bound  | 5.9         | 1           |
| TNBC     | Carboplatin,Paclitaxel                 | 4.8         | 1           |
| TNBC     | Eribulin                               | 4.67        | 1           |
| TNBC     | Gemcitabine                            | 2.88        | 1           |
| TNBC     | Carboplatin,Docetaxel                  | 2.06        | 1           |
| TNBC     | Docetaxel                              | 1.85        | 1           |
| TNBC     | Carboplatin,Paclitaxel Protein-Bound   | 1.65        | 1           |
| TNBC     | Cyclophosphamide,Docetaxel             | 1.51        | 1           |
| TNBC     | Carboplatin                            | 1.3         | 1           |
| TNBC     | Doxorubicin Pegylated Liposomal        | 1.24        | 1           |
| TNBC     | Cyclophosphamide,Docetaxel,Doxorubicin | 1.17        | 1           |
| TNBC     | Capecitabine,Ixabepilone               | 1.03        | 1           |
| TNBC     | Capecitabine                           | 13.94       | 2           |
| TNBC     | Eribulin                               | 10.06       | 2           |
| TNBC     | Paclitaxel                             | 9.16        | 2           |
| TNBC     | Carboplatin,Gemcitabine                | 6.32        | 2           |
| TNBC     | Paclitaxel Protein-Bound               | 4.9         | 2           |
| TNBC     | Gemcitabine                            | 4.65        | 2           |
| TNBC     | Doxorubicin Pegylated Liposomal        | 4.39        | 2           |
| TNBC     | Atezolizumab,Paclitaxel Protein-Bound  | 4.13        | 2           |



| Subgroup | LineName                              | Percent (%) | Line Number |
|----------|---------------------------------------|-------------|-------------|
| TNBC     | Carboplatin,Paclitaxel                | 3.87        | 2           |
| TNBC     | Cyclophosphamide,Doxorubicin          | 3.74        | 2           |
| TNBC     | Vinorelbine                           | 2.45        | 2           |
| TNBC     | Capecitabine,Ixabepilone              | 2.19        | 2           |
| TNBC     | Carboplatin                           | 2.19        | 2           |
| TNBC     | Ixabepilone                           | 2.06        | 2           |
| TNBC     | Docetaxel                             | 1.55        | 2           |
| TNBC     | Olaparib                              | 1.29        | 2           |
| TNBC     | Carboplatin,Paclitaxel Protein-Bound  | 1.03        | 2           |
| TNBC     | Eribulin                              | 18.53       | 3           |
| TNBC     | Capecitabine                          | 14.72       | 3           |
| TNBC     | Gemcitabine                           | 8.12        | 3           |
| TNBC     | Carboplatin,Gemcitabine               | 5.33        | 3           |
| TNBC     | Atezolizumab,Paclitaxel Protein-Bound | 4.57        | 3           |
| TNBC     | Doxorubicin Pegylated Liposomal       | 4.57        | 3           |
| TNBC     | Paclitaxel Protein-Bound              | 3.81        | 3           |
| TNBC     | Sacituzumab Govitecan-Hziy            | 3.05        | 3           |
| TNBC     | Paclitaxel                            | 2.79        | 3           |
| TNBC     | Ixabepilone                           | 2.54        | 3           |
| TNBC     | Vinorelbine                           | 2.54        | 3           |
| TNBC     | Carboplatin                           | 2.03        | 3           |
| TNBC     | Capecitabine,Ixabepilone              | 1.52        | 3           |
| TNBC     | Cyclophosphamide,Doxorubicin          | 1.52        | 3           |
| TNBC     | Nivolumab                             | 1.27        | 3           |
| TNBC     | Olaparib                              | 1.27        | 3           |
| TNBC     | Carboplatin,Paclitaxel                | 1.02        | 3           |
| TNBC     | Carboplatin,Paclitaxel Protein-Bound  | 1.02        | 3           |
| TNBC     | Cisplatin                             | 1.02        | 3           |
| TNBC     | Doxorubicin                           | 1.02        | 3           |
| TNBC     | Eribulin                              | 14.65       | 4           |
| TNBC     | Gemcitabine                           | 9.6         | 4           |
| TNBC     | Capecitabine                          | 8.59        | 4           |
| TNBC     | Vinorelbine                           | 8.08        | 4           |
| TNBC     | Doxorubicin Pegylated Liposomal       | 7.07        | 4           |
| TNBC     | Paclitaxel Protein-Bound              | 6.06        | 4           |

| Subgroup | LineName                                                     | Percent (%) | Line Number |
|----------|--------------------------------------------------------------|-------------|-------------|
| TNBC     | Carboplatin,Gemcitabine                                      | 4.55        | 4           |
| TNBC     | Ixabepilone                                                  | 4.55        | 4           |
| TNBC     | Atezolizumab,Paclitaxel Protein-Bound                        | 3.03        | 4           |
| TNBC     | Pembrolizumab                                                | 3.03        | 4           |
| TNBC     | Sacituzumab Govitecan-Hziy                                   | 3.03        | 4           |
| TNBC     | Carboplatin,Paclitaxel Protein-Bound                         | 1.52        | 4           |
| TNBC     | Nivolumab                                                    | 1.52        | 4           |
| TNBC     | Olaparib                                                     | 1.52        | 4           |
| TNBC     | Capecitabine,Gemcitabine                                     | 1.01        | 4           |
| TNBC     | Carboplatin                                                  | 1.01        | 4           |
| TNBC     | Cyclophosphamide,Docetaxel                                   | 1.01        | 4           |
| TNBC     | Doxorubicin                                                  | 1.01        | 4           |
| TNBC     | Eribulin                                                     | 10.98       | 5           |
| TNBC     | Vinorelbine                                                  | 10.98       | 5           |
| TNBC     | Carboplatin,Gemcitabine                                      | 8.54        | 5           |
| TNBC     | Paclitaxel Protein-Bound                                     | 8.54        | 5           |
| TNBC     | Doxorubicin Pegylated Liposomal                              | 7.32        | 5           |
| TNBC     | Capecitabine                                                 | 4.88        | 5           |
| TNBC     | Carboplatin                                                  | 4.88        | 5           |
| TNBC     | Sacituzumab Govitecan-Hziy                                   | 4.88        | 5           |
| TNBC     | Atezolizumab,Paclitaxel Protein-Bound                        | 3.66        | 5           |
| TNBC     | Gemcitabine                                                  | 3.66        | 5           |
| TNBC     | Ixabepilone                                                  | 3.66        | 5           |
| TNBC     | Cyclophosphamide,Fluorouracil,Methotrexate                   | 2.44        | 5           |
| TNBC     | Docetaxel                                                    | 2.44        | 5           |
| TNBC     | Pembrolizumab                                                | 2.44        | 5           |
| TNBC     | Cyclophosphamide,Methotrexate                                | 1.22        | 5           |
| TNBC     | Temozolomide                                                 | 1.22        | 5           |
| TNBC     | Atezolizumab,Capecitabine,Paclitaxel Protein-Bound,Tucatinib | 1.22        | 5           |
| TNBC     | Capecitabine,Gemcitabine,Vinorelbine                         | 1.22        | 5           |
| TNBC     | Capecitabine,Ixabepilone                                     | 1.22        | 5           |
| TNBC     | Capecitabine,Lapatinib                                       | 1.22        | 5           |
| TNBC     | Carboplatin,Eribulin,Gemcitabine                             | 1.22        | 5           |
| TNBC     | Carboplatin,Paclitaxel Protein-Bound                         | 1.22        | 5           |
| TNBC     | Carboplatin,Vinorelbine                                      | 1.22        | 5           |

| <b>Subgroup</b> | <b>LineName</b>                             | <b>Percent (%)</b> | <b>Line Number</b> |
|-----------------|---------------------------------------------|--------------------|--------------------|
| <b>TNBC</b>     | Cisplatin,Olaparib                          | 1.22               | 5                  |
| <b>TNBC</b>     | Cyclophosphamide,Docetaxel,Doxorubicin      | 1.22               | 5                  |
| <b>TNBC</b>     | Doxorubicin Pegylated Liposomal,Everolimus  | 1.22               | 5                  |
| <b>TNBC</b>     | Everolimus                                  | 1.22               | 5                  |
| <b>TNBC</b>     | Everolimus,Ixabepilone                      | 1.22               | 5                  |
| <b>TNBC</b>     | Gemcitabine,Paclitaxel Protein-Bound        | 1.22               | 5                  |
| <b>TNBC</b>     | Nivolumab                                   | 1.22               | 5                  |
| <b>TNBC</b>     | Nivolumab,Olaparib,Paclitaxel Protein-Bound | 1.22               | 5                  |

**eTable 4.** Most Frequently Used Drugs at a Yearly Level by Patient Count Per Drug for Each Subgroup and Year

| Subgroup | Drug         | Route         | Year | Patient Count |
|----------|--------------|---------------|------|---------------|
| HR+HER2- | palbociclib  | Oral          | 1    | 3362          |
| HR+HER2- | letrozole    | Oral          | 1    | 3357          |
| HR+HER2- | fulvestrant  | Intramuscular | 1    | 3138          |
| HR+HER2- | anastrozole  | Oral          | 1    | 1706          |
| HR+HER2- | capecitabine | Oral          | 1    | 1078          |
| HR+HER2- | fulvestrant  | Intramuscular | 2    | 2325          |
| HR+HER2- | palbociclib  | Oral          | 2    | 1513          |
| HR+HER2- | letrozole    | Oral          | 2    | 1326          |
| HR+HER2- | capecitabine | Oral          | 2    | 793           |
| HR+HER2- | exemestane   | Oral          | 2    | 791           |
| HR+HER2- | fulvestrant  | Intramuscular | 3    | 1561          |
| HR+HER2- | palbociclib  | Oral          | 3    | 1028          |
| HR+HER2- | letrozole    | Oral          | 3    | 790           |
| HR+HER2- | capecitabine | Oral          | 3    | 545           |
| HR+HER2- | exemestane   | Oral          | 3    | 540           |
| HR+HER2- | fulvestrant  | Intramuscular | 4    | 983           |
| HR+HER2- | palbociclib  | Oral          | 4    | 701           |
| HR+HER2- | letrozole    | Oral          | 4    | 513           |
| HR+HER2- | capecitabine | Oral          | 4    | 345           |
| HR+HER2- | exemestane   | Oral          | 4    | 323           |
| HR+HER2- | fulvestrant  | Intramuscular | 5    | 622           |
| HR+HER2- | palbociclib  | Oral          | 5    | 436           |
| HR+HER2- | letrozole    | Oral          | 5    | 307           |
| HR+HER2- | capecitabine | Oral          | 5    | 206           |
| HR+HER2- | exemestane   | Oral          | 5    | 160           |
| HR+HER2- | fulvestrant  | Intramuscular | 6    | 365           |
| HR+HER2- | palbociclib  | Oral          | 6    | 235           |
| HR+HER2- | letrozole    | Oral          | 6    | 142           |
| HR+HER2- | capecitabine | Oral          | 6    | 124           |
| HR+HER2- | exemestane   | Oral          | 6    | 88            |
| HR+HER2- | fulvestrant  | Intramuscular | 7    | 212           |
| HR+HER2- | palbociclib  | Oral          | 7    | 129           |
| HR+HER2- | letrozole    | Oral          | 7    | 81            |
| HR+HER2- | capecitabine | Oral          | 7    | 64            |
| HR+HER2- | exemestane   | Oral          | 7    | 59            |
| HR+HER2- | fulvestrant  | Intramuscular | 8    | 116           |

| Subgroup | Drug                      | Route         | Year | Patient Count |
|----------|---------------------------|---------------|------|---------------|
| HR+HER2- | palbociclib               | Oral          | 8    | 59            |
| HR+HER2- | letrozole                 | Oral          | 8    | 42            |
| HR+HER2- | capecitabine              | Oral          | 8    | 28            |
| HR+HER2- | exemestane                | Oral          | 8    | 24            |
| HR+HER2- | fulvestrant               | Intramuscular | 9    | 51            |
| HR+HER2- | palbociclib               | Oral          | 9    | 27            |
| HR+HER2- | letrozole                 | Oral          | 9    | 23            |
| HR+HER2- | capecitabine              | Oral          | 9    | 14            |
| HR+HER2- | anastrozole               | Oral          | 9    | 13            |
| HR+HER2- | fulvestrant               | Intramuscular | 10   | 16            |
| HR+HER2- | palbociclib               | Oral          | 10   | 12            |
| HR+HER2- | letrozole                 | Oral          | 10   | 11            |
| HR+HER2- | anastrozole               | Oral          | 10   | 9             |
| HR+HER2- | exemestane                | Oral          | 10   | 7             |
| HR+HER2+ | trastuzumab               | Intravenous   | 1    | 1595          |
| HR+HER2+ | pertuzumab                | Intravenous   | 1    | 1206          |
| HR+HER2+ | docetaxel                 | Intravenous   | 1    | 870           |
| HR+HER2+ | letrozole                 | Oral          | 1    | 573           |
| HR+HER2+ | anastrozole               | Oral          | 1    | 455           |
| HR+HER2+ | trastuzumab               | Intravenous   | 2    | 1001          |
| HR+HER2+ | pertuzumab                | Intravenous   | 2    | 667           |
| HR+HER2+ | ado-trastuzumab emtansine | Intravenous   | 2    | 378           |
| HR+HER2+ | fulvestrant               | Intramuscular | 2    | 347           |
| HR+HER2+ | letrozole                 | Oral          | 2    | 287           |
| HR+HER2+ | trastuzumab               | Intravenous   | 3    | 609           |
| HR+HER2+ | pertuzumab                | Intravenous   | 3    | 373           |
| HR+HER2+ | ado-trastuzumab emtansine | Intravenous   | 3    | 284           |
| HR+HER2+ | fulvestrant               | Intramuscular | 3    | 250           |
| HR+HER2+ | letrozole                 | Oral          | 3    | 172           |
| HR+HER2+ | trastuzumab               | Intravenous   | 4    | 386           |
| HR+HER2+ | pertuzumab                | Intravenous   | 4    | 208           |
| HR+HER2+ | ado-trastuzumab emtansine | Intravenous   | 4    | 184           |
| HR+HER2+ | fulvestrant               | Intramuscular | 4    | 171           |
| HR+HER2+ | letrozole                 | Oral          | 4    | 109           |
| HR+HER2+ | trastuzumab               | Intravenous   | 5    | 224           |
| HR+HER2+ | pertuzumab                | Intravenous   | 5    | 130           |
| HR+HER2+ | fulvestrant               | Intramuscular | 5    | 108           |

| Subgroup | Drug                      | Route         | Year | Patient Count |
|----------|---------------------------|---------------|------|---------------|
| HR+HER2+ | ado-trastuzumab emtansine | Intravenous   | 5    | 104           |
| HR+HER2+ | letrozole                 | Oral          | 5    | 64            |
| HR+HER2+ | trastuzumab               | Intravenous   | 6    | 130           |
| HR+HER2+ | pertuzumab                | Intravenous   | 6    | 80            |
| HR+HER2+ | ado-trastuzumab emtansine | Intravenous   | 6    | 59            |
| HR+HER2+ | fulvestrant               | Intramuscular | 6    | 59            |
| HR+HER2+ | trastuzumab-anns          | Intravenous   | 6    | 44            |
| HR+HER2+ | trastuzumab               | Intravenous   | 7    | 80            |
| HR+HER2+ | pertuzumab                | Intravenous   | 7    | 49            |
| HR+HER2+ | fulvestrant               | Intramuscular | 7    | 35            |
| HR+HER2+ | trastuzumab-anns          | Intravenous   | 7    | 33            |
| HR+HER2+ | ado-trastuzumab emtansine | Intravenous   | 7    | 32            |
| HR+HER2+ | trastuzumab               | Intravenous   | 8    | 39            |
| HR+HER2+ | trastuzumab-anns          | Intravenous   | 8    | 21            |
| HR+HER2+ | ado-trastuzumab emtansine | Intravenous   | 8    | 17            |
| HR+HER2+ | pertuzumab                | Intravenous   | 8    | 17            |
| HR+HER2+ | letrozole                 | Oral          | 8    | 16            |
| HR+HER2+ | trastuzumab               | Intravenous   | 9    | 16            |
| HR+HER2+ | trastuzumab-anns          | Intravenous   | 9    | 14            |
| HR+HER2+ | ado-trastuzumab emtansine | Intravenous   | 9    | 8             |
| HR+HER2+ | fulvestrant               | Intramuscular | 9    | 8             |
| HR+HER2+ | pertuzumab                | Intravenous   | 9    | 8             |
| HR+HER2+ | trastuzumab               | Intravenous   | 10   | 5             |
| HR+HER2+ | letrozole                 | Oral          | 10   | 4             |
| HR+HER2+ | ado-trastuzumab emtansine | Intravenous   | 10   | 4             |
| HR+HER2+ | fulvestrant               | Intramuscular | 10   | 4             |
| HR+HER2+ | palbociclib               | Oral          | 10   | 3             |
| HR-HER2+ | trastuzumab               | Intravenous   | 1    | 566           |
| HR-HER2+ | pertuzumab                | Intravenous   | 1    | 415           |
| HR-HER2+ | docetaxel                 | Intravenous   | 1    | 331           |
| HR-HER2+ | paclitaxel                | Intravenous   | 1    | 173           |
| HR-HER2+ | ado-trastuzumab emtansine | Intravenous   | 1    | 144           |
| HR-HER2+ | trastuzumab               | Intravenous   | 2    | 292           |
| HR-HER2+ | pertuzumab                | Intravenous   | 2    | 188           |
| HR-HER2+ | ado-trastuzumab emtansine | Intravenous   | 2    | 125           |
| HR-HER2+ | capecitabine              | Oral          | 2    | 83            |
| HR-HER2+ | lapatinib                 | Oral          | 2    | 58            |

| Subgroup | Drug                            | Route       | Year | Patient Count |
|----------|---------------------------------|-------------|------|---------------|
| HR-HER2+ | trastuzumab                     | Intravenous | 3    | 156           |
| HR-HER2+ | pertuzumab                      | Intravenous | 3    | 105           |
| HR-HER2+ | ado-trastuzumab emtansine       | Intravenous | 3    | 85            |
| HR-HER2+ | capecitabine                    | Oral        | 3    | 43            |
| HR-HER2+ | lapatinib                       | Oral        | 3    | 38            |
| HR-HER2+ | trastuzumab                     | Intravenous | 4    | 87            |
| HR-HER2+ | pertuzumab                      | Intravenous | 4    | 53            |
| HR-HER2+ | ado-trastuzumab emtansine       | Intravenous | 4    | 43            |
| HR-HER2+ | capecitabine                    | Oral        | 4    | 22            |
| HR-HER2+ | lapatinib                       | Oral        | 4    | 20            |
| HR-HER2+ | trastuzumab                     | Intravenous | 5    | 60            |
| HR-HER2+ | pertuzumab                      | Intravenous | 5    | 40            |
| HR-HER2+ | ado-trastuzumab emtansine       | Intravenous | 5    | 23            |
| HR-HER2+ | trastuzumab-anns                | Intravenous | 5    | 12            |
| HR-HER2+ | lapatinib                       | Oral        | 5    | 7             |
| HR-HER2+ | trastuzumab                     | Intravenous | 6    | 37            |
| HR-HER2+ | pertuzumab                      | Intravenous | 6    | 25            |
| HR-HER2+ | ado-trastuzumab emtansine       | Intravenous | 6    | 16            |
| HR-HER2+ | trastuzumab-anns                | Intravenous | 6    | 10            |
| HR-HER2+ | capecitabine                    | Oral        | 6    | 5             |
| HR-HER2+ | trastuzumab                     | Intravenous | 7    | 20            |
| HR-HER2+ | ado-trastuzumab emtansine       | Intravenous | 7    | 13            |
| HR-HER2+ | pertuzumab                      | Intravenous | 7    | 13            |
| HR-HER2+ | trastuzumab-anns                | Intravenous | 7    | 8             |
| HR-HER2+ | fam-trastuzumab deruxtecan-nxki | Intravenous | 7    | 3             |
| HR-HER2+ | trastuzumab                     | Intravenous | 8    | 10            |
| HR-HER2+ | ado-trastuzumab emtansine       | Intravenous | 8    | 6             |
| HR-HER2+ | trastuzumab-anns                | Intravenous | 8    | 6             |
| HR-HER2+ | pertuzumab                      | Intravenous | 8    | 4             |
| HR-HER2+ | lapatinib                       | Oral        | 8    | 1             |
| HR-HER2+ | trastuzumab                     | Intravenous | 9    | 8             |
| HR-HER2+ | trastuzumab-anns                | Intravenous | 9    | 5             |
| HR-HER2+ | pertuzumab                      | Intravenous | 9    | 4             |
| HR-HER2+ | ado-trastuzumab emtansine       | Intravenous | 9    | 2             |
| HR-HER2+ | lapatinib                       | Oral        | 9    | 1             |
| HR-HER2+ | trastuzumab                     | Intravenous | 10   | 3             |
| HR-HER2+ | trastuzumab-anns                | Intravenous | 10   | 3             |

| Subgroup | Drug                            | Route       | Year | Patient Count |
|----------|---------------------------------|-------------|------|---------------|
| HR-HER2+ | ado-trastuzumab emtansine       | Intravenous | 10   | 2             |
| HR-HER2+ | lapatinib                       | Oral        | 10   | 1             |
| HR-HER2+ | pertuzumab                      | Intravenous | 10   | 1             |
| TNBC     | capecitabine                    | Oral        | 1    | 448           |
| TNBC     | carboplatin                     | Intravenous | 1    | 399           |
| TNBC     | paclitaxel protein-bound        | Intravenous | 1    | 370           |
| TNBC     | gemcitabine                     | Intravenous | 1    | 352           |
| TNBC     | paclitaxel                      | Intravenous | 1    | 341           |
| TNBC     | capecitabine                    | Oral        | 2    | 136           |
| TNBC     | gemcitabine                     | Intravenous | 2    | 105           |
| TNBC     | paclitaxel protein-bound        | Intravenous | 2    | 104           |
| TNBC     | eribulin                        | Intravenous | 2    | 89            |
| TNBC     | carboplatin                     | Intravenous | 2    | 72            |
| TNBC     | capecitabine                    | Oral        | 3    | 42            |
| TNBC     | paclitaxel protein-bound        | Intravenous | 3    | 36            |
| TNBC     | gemcitabine                     | Intravenous | 3    | 23            |
| TNBC     | eribulin                        | Intravenous | 3    | 23            |
| TNBC     | doxorubicin pegylated liposomal | Intravenous | 3    | 17            |
| TNBC     | paclitaxel protein-bound        | Intravenous | 4    | 11            |
| TNBC     | capecitabine                    | Oral        | 4    | 9             |
| TNBC     | gemcitabine                     | Intravenous | 4    | 8             |
| TNBC     | vinorelbine                     | Intravenous | 4    | 8             |
| TNBC     | eribulin                        | Intravenous | 4    | 8             |
| TNBC     | paclitaxel protein-bound        | Intravenous | 5    | 9             |
| TNBC     | capecitabine                    | Oral        | 5    | 4             |
| TNBC     | atezolizumab                    | Intravenous | 5    | 4             |
| TNBC     | doxorubicin pegylated liposomal | Intravenous | 5    | 3             |
| TNBC     | eribulin                        | Intravenous | 5    | 3             |
| TNBC     | capecitabine                    | Oral        | 6    | 2             |
| TNBC     | olaparib                        | Oral        | 6    | 2             |
| TNBC     | doxorubicin pegylated liposomal | Intravenous | 6    | 2             |
| TNBC     | nivolumab                       | Intravenous | 6    | 2             |
| TNBC     | anastrozole                     | Oral        | 6    | 1             |
| TNBC     | capecitabine                    | Oral        | 7    | 1             |
| TNBC     | olaparib                        | Oral        | 7    | 1             |
| TNBC     | doxorubicin pegylated liposomal | Intravenous | 7    | 1             |
| TNBC     | carboplatin                     | Intravenous | 7    | 1             |



| <b>Subgroup</b> | <b>Drug</b>                     | <b>Route</b> | <b>Year</b> | <b>Patient Count</b> |
|-----------------|---------------------------------|--------------|-------------|----------------------|
| TNBC            | gemcitabine                     | Intravenous  | 7           | 1                    |
| TNBC            | letrozole                       | Oral         | 8           | 1                    |
| TNBC            | doxorubicin pegylated liposomal | Intravenous  | 8           | 1                    |

**eTable 5.** Percentage of Patients Receiving Supportive Drugs by Subgroup and Line Number

| Line Number | Subgroup | # of Patients Receiving Supportive Drugs | Total # of patients | % of patients |
|-------------|----------|------------------------------------------|---------------------|---------------|
| 1           | HR+HER2- | 1,434                                    | 10,171              | 14.1          |
| 1           | HR+HER2+ | 854                                      | 2,785               | 30.7          |
| 1           | HR-HER2+ | 361                                      | 802                 | 45.0          |
| 1           | TNBC     | 671                                      | 1457                | 46.1          |
| 2           | HR+HER2- | 1,031                                    | 6,546               | 15.8          |
| 2           | HR+HER2+ | 376                                      | 2,034               | 18.5          |
| 2           | HR-HER2+ | 112                                      | 407                 | 27.5          |
| 2           | TNBC     | 351                                      | 775                 | 45.3          |
| 3           | HR+HER2- | 763                                      | 4,179               | 18.3          |
| 3           | HR+HER2+ | 234                                      | 1,132               | 20.7          |
| 3           | HR-HER2+ | 67                                       | 220                 | 30.5          |
| 3           | TNBC     | 163                                      | 394                 | 41.4          |
| 4           | HR+HER2- | 627                                      | 2,640               | 23.8          |
| 4           | HR+HER2+ | 160                                      | 861                 | 18.6          |
| 4           | HR-HER2+ | 33                                       | 113                 | 29.2          |
| 4           | TNBC     | 87                                       | 198                 | 43.9          |
| 5           | HR+HER2- | 510                                      | 1,676               | 30.4          |
| 5           | HR-HER2+ | 22                                       | 62                  | 35.5          |
| 5           | HR+HER2+ | 124                                      | 552                 | 22.5          |
| 5           | TNBC     | 33                                       | 82                  | 40.2          |

**eTable 6.** Annual AWP Anticancer and Supportive Drug Costs by Year After Diagnosis and Subgroup

\*Note the listed cost for all years for anti-cancer, supportive and total cost represents the mean cumulative cost per patient by subgroup; this cost is less than the sum of Years 1 through 10 since not all patients had ten years of treatment data.

|                        | <b>Year</b>      | <b>HR+HER2-</b> | <b>HR+HER2+</b> | <b>HR-HER2+</b> | <b>TNBC</b> |
|------------------------|------------------|-----------------|-----------------|-----------------|-------------|
|                        | 1                | 762,87          | 183,726         | 163,977         | 41,838      |
|                        | 2                | 71,082          | 166,042         | 159,327         | 49,485      |
|                        | 3                | 71,876          | 152,540         | 160,251         | 65,672      |
|                        | 4                | 75,955          | 153,012         | 160,409         | 82,495      |
|                        | 5                | 71,621          | 150,048         | 150,021         | 117,169     |
|                        | 6                | 72,856          | 144,384         | 168,687         | 85,204      |
|                        | 7                | 68,567          | 137,424         | 139,538         | 48,518      |
|                        | 8                | 67,755          | 122,509         | 117,956         | 22,451      |
|                        | 9                | 58,607          | 93,911          | 99,388          |             |
|                        | 10               | 58,365          | 113,053         | 48,301          |             |
|                        | <b>All Years</b> | 171,243         | 455,722         | 374,166         | 66,466      |
|                        | 1                | 8,718           | 21,412          | 28,390          | 25,161      |
|                        | 2                | 7,374           | 7,010           | 9,428           | 20,575      |
|                        | 3                | 7,073           | 6,334           | 6,106           | 22,531      |
|                        | 4                | 8,444           | 6,199           | 4,681           | 10,372      |
|                        | 5                | 7,555           | 6,047           | 6,543           | 7,988       |
|                        | 6                | 6,904           | 4,981           | 5,889           | 2,723       |
|                        | 7                | 5,267           | 4,713           | 2,053           | 3,655       |
|                        | 8                | 5,058           | 5,747           | 2,221           |             |
|                        | 9                | 3,690           | 6,404           |                 |             |
|                        | 10               | 2,605           |                 |                 |             |
|                        | <b>All Years</b> | 18,381          | 32,348          | 36,969          | 33,496      |
| <b>Supportive Cost</b> | <b>All Years</b> | 18,381          | 32,348          | 36,969          | 33,496      |
| <b>Total Cost</b>      | <b>All Years</b> | 189,624         | 488,069         | 411,135         | 99,962      |

**eTable 7.** AWP and Medicare Anticancer and Supportive Drug Costs by Line and Subgroup for the First 5 Lines of Therapy

| Subgroup | Line# | MC Anti-cancer cost | AWP Anti-cancer cost | MC Supportive cost | AWP Supportive cost | Total MC cost | Total AWP cost | Patient Count |
|----------|-------|---------------------|----------------------|--------------------|---------------------|---------------|----------------|---------------|
| HR+HER2- | 1     | 68,389              | 106,107              | 831                | 2,670               | 69,220        | 108,777        | 5,346         |
| HR+HER2- | 2     | 42,762              | 77,238               | 617                | 1,889               | 43,379        | 79,127         | 3,958         |
| HR+HER2- | 3     | 31,038              | 59,459               | 853                | 2,740               | 31,891        | 62,199         | 2,512         |
| HR+HER2- | 4     | 26,857              | 51,000               | 1,434              | 4,555               | 28,291        | 55,555         | 1,566         |
| HR+HER2- | 5     | 22,323              | 41,521               | 1,619              | 5,050               | 23,942        | 46,572         | 1,052         |
| HR-HER2+ | 1     | 170,017             | 229,339              | 4,119              | 13,528              | 174,136       | 242,867        | 619           |
| HR-HER2+ | 2     | 103,500             | 140,931              | 956                | 2,917               | 104,455       | 143,848        | 291           |
| HR-HER2+ | 3     | 73,702              | 100,003              | 1,605              | 5,198               | 75,307        | 105,202        | 174           |
| HR-HER2+ | 4     | 62,113              | 86,687               | 1,650              | 5,020               | 63,763        | 91,707         | 107           |
| HR-HER2+ | 5     | 46,227              | 63,594               | 1,591              | 5,325               | 47,818        | 68,919         | 58            |
| HR+HER2+ | 1     | 104,072             | 143,341              | 3,542              | 11,733              | 107,614       | 155,073        | 1,448         |
| HR+HER2+ | 2     | 112,508             | 155,217              | 686                | 2,190               | 113,194       | 157,407        | 1,062         |
| HR+HER2+ | 3     | 95,752              | 130,148              | 590                | 1,988               | 96,342        | 132,136        | 696           |
| HR+HER2+ | 4     | 78,320              | 110,305              | 970                | 3,045               | 79,290        | 113,350        | 435           |
| HR+HER2+ | 5     | 56,467              | 82,434               | 707                | 2,227               | 57,173        | 84,661         | 260           |
| TNBC     | 1     | 15,633              | 26,515               | 2,879              | 9,256               | 18,512        | 35,771         | 1,169         |
| TNBC     | 2     | 18,804              | 28,535               | 2,449              | 7,396               | 21,253        | 35,932         | 599           |
| TNBC     | 3     | 20,775              | 29,595               | 2,228              | 6,994               | 23,002        | 36,588         | 319           |
| TNBC     | 4     | 18,841              | 27,510               | 1,976              | 6,279               | 20,817        | 33,789         | 159           |
| TNBC     | 5     | 21,750              | 29,367               | 1,876              | 6,234               | 23,627        | 35,601         | 80            |

\*MC=Medicare

**eTable 8.** Most Costly Drug Regimens by Subgroup and Associated Costs for Each of the First 5 Lines of Therapy

| Line Name                         | Sub group | Line Number | AWP price | Medicare Price |
|-----------------------------------|-----------|-------------|-----------|----------------|
| Letrozole,Palbociclib             | HR+HER 2- | 1           | 296,254   | 222,014        |
| Letrozole,Ribociclib              | HR+HER 2- | 1           | 253,055   | 62,503         |
| Fulvestrant,Palbociclib           | HR+HER 2- | 1           | 239,214   | 160,297        |
| Anastrozole,Palbociclib           | HR+HER 2- | 1           | 200,210   | 151,987        |
| Everolimus,Exemestane             | HR+HER 2- | 1           | 197,012   | 69,085         |
| Letrozole,Ribociclib              | HR+HER 2- | 2           | 264,010   | 65,693         |
| Letrozole,Palbociclib             | HR+HER 2- | 2           | 222,493   | 168,132        |
| Fulvestrant,Palbociclib           | HR+HER 2- | 2           | 165,117   | 105,901        |
| Abemaciclib,Fulvestrant           | HR+HER 2- | 2           | 155,189   | 107,218        |
| Anastrozole,Palbociclib           | HR+HER 2- | 2           | 154,057   | 118,046        |
| Letrozole,Palbociclib             | HR+HER 2- | 3           | 181,994   | 136,788        |
| Fulvestrant,Palbociclib           | HR+HER 2- | 3           | 140,394   | 91,193         |
| Abemaciclib,Fulvestrant           | HR+HER 2- | 3           | 137,184   | 94,408         |
| Alpelisib,Fulvestrant             | HR+HER 2- | 3           | 115,001   | 45,194         |
| Everolimus,Exemestane             | HR+HER 2- | 3           | 111,387   | 39,068         |
| Fulvestrant,Palbociclib           | HR+HER 2- | 4           | 140,857   | 91,393         |
| Abemaciclib,Fulvestrant           | HR+HER 2- | 4           | 130,635   | 93,287         |
| Letrozole,Palbociclib             | HR+HER 2- | 4           | 126,064   | 94,798         |
| Everolimus,Exemestane             | HR+HER 2- | 4           | 121,555   | 42,651         |
| Alpelisib,Fulvestrant             | HR+HER 2- | 4           | 82,708    | 32,672         |
| Fulvestrant,Letrozole,Palbociclib | HR+HER 2- | 5           | 154,818   | 106,372        |
| Abemaciclib,Fulvestrant           | HR+HER 2- | 5           | 137,461   | 93,246         |
| Everolimus,Exemestane             | HR+HER 2- | 5           | 131,404   | 46,122         |

| Line Name                                    | Sub group | Line Number | AWP price | Medicare Price |
|----------------------------------------------|-----------|-------------|-----------|----------------|
| Alpelisib,Fulvestrant                        | HR+HER 2- | 5           | 120,526   | 47,694         |
| Letrozole,Palbociclib                        | HR+HER 2- | 5           | 114,412   | 85,434         |
| Docetaxel,Paclitaxel,Pertuzumab,Trastuzumab  | HR+HER 2+ | 1           | 234,848   | 178,587        |
| Docetaxel,Pertuzumab,Trastuzumab             | HR+HER 2+ | 1           | 224,545   | 168,540        |
| Letrozole,Palbociclib                        | HR+HER 2+ | 1           | 219,389   | 164,079        |
| Pertuzumab,Trastuzumab                       | HR+HER 2+ | 1           | 205,594   | 160,568        |
| Paclitaxel,Pertuzumab,Trastuzumab            | HR+HER 2+ | 1           | 195,807   | 150,807        |
| Docetaxel,Letrozole,Pertuzumab,Trastuzumab   | HR+HER 2+ | 2           | 420,572   | 313,396        |
| Letrozole,Pertuzumab,Trastuzumab             | HR+HER 2+ | 2           | 347,565   | 264,705        |
| Anastrozole,Pertuzumab,Trastuzumab           | HR+HER 2+ | 2           | 295,560   | 226,217        |
| Fulvestrant,Pertuzumab,Trastuzumab           | HR+HER 2+ | 2           | 279,621   | 193,815        |
| Anastrozole,Docetaxel,Pertuzumab,Trastuzumab | HR+HER 2+ | 2           | 265,590   | 197,326        |
| Pertuzumab,Tamoxifen,Trastuzumab             | HR+HER 2+ | 3           | 427,251   | 330,625        |
| Letrozole,Pertuzumab,Trastuzumab             | HR+HER 2+ | 3           | 270,049   | 206,946        |
| Fulvestrant,Pertuzumab,Trastuzumab           | HR+HER 2+ | 3           | 248,925   | 175,370        |
| Exemestane,Trastuzumab                       | HR+HER 2+ | 3           | 220,762   | 157,962        |
| Anastrozole,Pertuzumab,Trastuzumab           | HR+HER 2+ | 3           | 213,129   | 165,406        |
| Exemestane,Pertuzumab,Trastuzumab            | HR+HER 2+ | 4           | 414,320   | 319,237        |
| Anastrozole,Pertuzumab,Trastuzumab           | HR+HER 2+ | 4           | 300,214   | 231,188        |
| Ado-Trastuzumab Emtansine,Tamoxifen          | HR+HER 2+ | 4           | 246,748   | 212,900        |
| Paclitaxel,Pertuzumab,Trastuzumab            | HR+HER 2+ | 4           | 232,821   | 184,162        |
| Capecitabine,Trastuzumab                     | HR+HER 2+ | 4           | 197,832   | 90,525         |
| Fulvestrant,Trastuzumab                      | HR+HER 2+ | 5           | 186,164   | 110,470        |
| Anastrozole,Pertuzumab,Trastuzumab           | HR+HER 2+ | 5           | 173,217   | 134,913        |

| Line Name                                               | Sub group | Line Number | AWP price | Medicare Price |
|---------------------------------------------------------|-----------|-------------|-----------|----------------|
| Docetaxel,Pertuzumab,Trastuzumab                        | HR+HER 2+ | 5           | 169,705   | 123,636        |
| Paclitaxel Protein-Bound,Trastuzumab                    | HR+HER 2+ | 5           | 160,436   | 118,311        |
| Ado-Trastuzumab Emtansine,Fulvestrant                   | HR+HER 2+ | 5           | 158,601   | 121,836        |
| Docetaxel,Paclitaxel,Pertuzumab,Trastuzumab             | HR-HER2+  | 1           | 389,615   | 295,333        |
| Docetaxel,Pertuzumab,Trastuzumab                        | HR-HER2+  | 1           | 381,274   | 289,128        |
| Carboplatin,Docetaxel,Pertuzumab,Trastuzumab            | HR-HER2+  | 1           | 345,698   | 260,457        |
| Paclitaxel Protein-Bound,Pertuzumab,Trastuzumab         | HR-HER2+  | 1           | 320,343   | 248,619        |
| Paclitaxel,Pertuzumab,Trastuzumab-Anns                  | HR-HER2+  | 1           | 298,780   | 205,220        |
| Paclitaxel,Pertuzumab,Trastuzumab                       | HR-HER2+  | 2           | 367,037   | 281,797        |
| Docetaxel,Trastuzumab                                   | HR-HER2+  | 2           | 316,569   | 213,453        |
| Lapatinib,Trastuzumab                                   | HR-HER2+  | 2           | 306,330   | 161,069        |
| Pertuzumab,Trastuzumab,Vinorelbine                      | HR-HER2+  | 2           | 301,908   | 237,066        |
| Docetaxel,Pertuzumab,Trastuzumab                        | HR-HER2+  | 2           | 265,094   | 201,847        |
| Pertuzumab,Trastuzumab,Vinorelbine                      | HR-HER2+  | 3           | 547,755   | 417,915        |
| Capecitabine,Pertuzumab,Trastuzumab                     | HR-HER2+  | 3           | 339,783   | 242,442        |
| Capecitabine,Trastuzumab-Anns,Tucatinib                 | HR-HER2+  | 3           | 171,079   | 125,233        |
| Trastuzumab                                             | HR-HER2+  | 3           | 164,891   | 117,569        |
| Ado-Trastuzumab Emtansine,Neratinib                     | HR-HER2+  | 3           | 164,289   | 107,679        |
| Alpelisib,Paclitaxel Protein-Bound                      | HR-HER2+  | 4           | 318,322   | 172,880        |
| Paclitaxel,Pertuzumab,Trastuzumab                       | HR-HER2+  | 4           | 316,858   | 254,198        |
| Capecitabine,Trastuzumab,Tucatinib                      | HR-HER2+  | 4           | 282,427   | 212,008        |
| Capecitabine,Trastuzumab-Anns,Tucatinib                 | HR-HER2+  | 4           | 267,288   | 191,819        |
| Eribulin,Lapatinib                                      | HR-HER2+  | 4           | 251,596   | 208,202        |
| Carboplatin,Fam-Trastuzumab Deruxtecan-Nxki,Gemcitabine | HR-HER2+  | 5           | 212,997   | 182,040        |

| Line Name                                       | Sub group | Line Number | AWP price | Medicare Price |
|-------------------------------------------------|-----------|-------------|-----------|----------------|
| Fam-Trastuzumab Deruxtecan-Nxki                 | HR-HER2+  | 5           | 159,662   | 136,501        |
| Fam-Trastuzumab Deruxtecan-Nxki,Trastuzumab     | HR-HER2+  | 5           | 144,227   | 117,266        |
| Paclitaxel Protein-Bound,Pertuzumab,Trastuzumab | HR-HER2+  | 5           | 136,751   | 107,321        |
| Ado-Trastuzumab Emtansine                       | HR-HER2+  | 5           | 124,605   | 107,679        |
| Atezolizumab,Paclitaxel Protein-Bound           | TNBC      | 1           | 130,678   | 106,683        |
| Capecitabine,Ixabepilone                        | TNBC      | 1           | 62,689    | 42,115         |
| Paclitaxel Protein-Bound                        | TNBC      | 1           | 52,120    | 40,437         |
| Carboplatin,Paclitaxel Protein-Bound            | TNBC      | 1           | 43,903    | 33,758         |
| Eribulin                                        | TNBC      | 1           | 34,687    | 28,704         |
| Atezolizumab,Paclitaxel Protein-Bound           | TNBC      | 2           | 160,657   | 131,055        |
| Sacituzumab Govitecan-Hziy                      | TNBC      | 2           | 142,744   | 121,762        |
| Carboplatin,Paclitaxel Protein-Bound            | TNBC      | 2           | 78,241    | 60,391         |
| Capecitabine,Ixabepilone                        | TNBC      | 2           | 73,774    | 49,558         |
| Olaparib                                        | TNBC      | 2           | 73,617    | 32,442         |
| Sacituzumab Govitecan-Hziy                      | TNBC      | 3           | 178,278   | 152,073        |
| Atezolizumab,Paclitaxel Protein-Bound           | TNBC      | 3           | 78,697    | 64,162         |
| Capecitabine,Sacituzumab Govitecan-Hziy         | TNBC      | 3           | 68,322    | 58,279         |
| Capecitabine,Ixabepilone                        | TNBC      | 3           | 45,462    | 28,864         |
| Pembrolizumab                                   | TNBC      | 3           | 36,242    | 31,652         |
| Olaparib                                        | TNBC      | 4           | 137,265   | 60,491         |
| Atezolizumab,Paclitaxel Protein-Bound           | TNBC      | 4           | 114,184   | 93,071         |
| Sacituzumab Govitecan-Hziy                      | TNBC      | 4           | 108,888   | 92,883         |
| Ixabepilone                                     | TNBC      | 4           | 54,366    | 45,967         |
| Pembrolizumab                                   | TNBC      | 4           | 34,229    | 29,893         |
| Atezolizumab,Paclitaxel Protein-Bound           | TNBC      | 5           | 174,032   | 142,229        |
| Sacituzumab Govitecan-Hziy                      | TNBC      | 5           | 112,091   | 95,615         |
| Pembrolizumab                                   | TNBC      | 5           | 78,525    | 68,580         |
| Doxorubicin Pegylated Liposomal,Everolimus      | TNBC      | 5           | 71,447    | 28,967         |
| Carboplatin,Paclitaxel Protein-Bound            | TNBC      | 5           | 59,278    | 45,430         |



**eTable 9.** Mean and Median Medicare Costs for Patients Receiving Supportive Care by Subgroup and Year

| Subgroup        | Y          | Mean (2021 USD) | SD (2021 USD) | Median (2021 USD) | Q1           | Q3            | # Receiving Supportive Drugs | Total #      | %         |
|-----------------|------------|-----------------|---------------|-------------------|--------------|---------------|------------------------------|--------------|-----------|
| HR+HER2-        | 1          | 14,025          | 13,996        | 9,367             | 2,819        | 21,295        | 2,033                        | 9,581        | 21        |
| HR+HER2-        | 2          | 13,507          | 16,170        | 7,754             | 1,910        | 18,491        | 956                          | 4,929        | 19        |
| HR+HER2-        | 3          | 13,087          | 15,596        | 7,044             | 2,347        | 18,718        | 644                          | 3,272        | 20        |
| HR+HER2-        | 4          | 14,981          | 15,973        | 9,101             | 3,522        | 22,216        | 416                          | 2,039        | 20        |
| HR+HER2-        | 5          | 14,310          | 17,991        | 6,928             | 2,115        | 19,999        | 240                          | 1,278        | 19        |
| HR+HER2-        | 6          | 13,646          | 14,725        | 8,887             | 2,091        | 19,167        | 133                          | 745          | 18        |
| HR+HER2-        | 7          | 11,567          | 16,460        | 4,815             | 1,824        | 13,377        | 70                           | 443          | 16        |
| HR+HER2-        | 8          | 9,765           | 9,746         | 7,357             | 3,114        | 13,008        | 43                           | 226          | 19        |
| HR+HER2-        | 9          | 8,217           | 11,212        | 4,437             | 2,150        | 9,507         | 18                           | 118          | 15        |
| HR+HER2-        | 10         | 9,017           | 7,924         | 8,887             | 3,463        | 14,441        | 4                            | 48           | 8         |
| <b>HR+HER2-</b> | <b>All</b> | <b>20,668</b>   | <b>28,375</b> | <b>11,744</b>     | <b>3,522</b> | <b>26,660</b> | <b>3,036</b>                 | <b>9,767</b> | <b>31</b> |
| HR+HER2+        | 1          | 17,250          | 14,318        | 15,208            | 4,443        | 26,660        | 1,075                        | 2,652        | 41        |
| HR+HER2+        | 2          | 13,389          | 17,172        | 7,007             | 2,115        | 17,773        | 322                          | 1,740        | 19        |
| HR+HER2+        | 3          | 12,407          | 16,265        | 5,854             | 1,410        | 17,773        | 224                          | 1,208        | 19        |
| HR+HER2+        | 4          | 12,790          | 15,578        | 7,790             | 2,362        | 17,735        | 138                          | 755          | 18        |
| HR+HER2+        | 5          | 12,622          | 14,591        | 8,897             | 1,702        | 16,196        | 82                           | 463          | 18        |
| HR+HER2+        | 6          | 11,113          | 15,533        | 4,691             | 1,539        | 13,596        | 47                           | 296          | 16        |
| HR+HER2+        | 7          | 10,610          | 13,645        | 4,735             | 1,410        | 10,629        | 27                           | 178          | 15        |
| HR+HER2+        | 8          | 14,997          | 13,895        | 5,639             | 4,443        | 31,103        | 13                           | 97           | 13        |
| HR+HER2+        | 9          | 15,136          | 15,066        | 10,952            | 2,574        | 24,638        | 7                            | 55           | 13        |
| <b>HR+HER2+</b> | <b>All</b> | <b>23,136</b>   | <b>28,602</b> | <b>17,773</b>     | <b>4,735</b> | <b>28,821</b> | <b>1,278</b>                 | <b>2,703</b> | <b>47</b> |
| HR-HER2+        | 1          | 17,675          | 14,747        | 14,720            | 4,443        | 26,660        | 392                          | 760          | 52        |
| HR-HER2+        | 2          | 14,961          | 19,268        | 7,287             | 1,326        | 19,943        | 94                           | 427          | 22        |

| Subgroup        | Y         | Mean<br>(2021<br>USD) | SD<br>(2021<br>USD) | Median<br>(2021<br>USD) | Q1           | Q3            | #<br>Receiving<br>Supportiv<br>e<br>Drugs | Total<br>#   | %         |
|-----------------|-----------|-----------------------|---------------------|-------------------------|--------------|---------------|-------------------------------------------|--------------|-----------|
| HR-HER2+        | 3         | 11,189                | 13,888              | 6,459                   | 1,434        | 16,526        | 56                                        | 266          | 21        |
| HR-HER2+        | 4         | 8,517                 | 15,146              | 4,206                   | 1,410        | 8,956         | 32                                        | 158          | 20        |
| HR-HER2+        | 5         | 21,904                | 25,341              | 15,341                  | 4,397        | 23,390        | 9                                         | 96           | 9         |
| HR-HER2+        | 6         | 15,326                | 25,483              | 5,285                   | 1,410        | 13,813        | 7                                         | 57           | 12        |
| HR-HER2+        | 7         | 5,544                 | 8,322               | 1,922                   | 480          | 4,934         | 5                                         | 39           | 13        |
| HR-HER2+        | 8         | 5,134                 | 1,197               | 4,443                   | 4,443        | 5,480         | 3                                         | 24           | 13        |
| <b>HR-HER2+</b> | <b>AI</b> | <b>22,179</b>         | <b>30,347</b>       | <b>16,079</b>           | <b>4,480</b> | <b>28,630</b> | <b>432</b>                                | <b>787</b>   | <b>55</b> |
| TNBC            | 1         | 15,433                | 14,515              | 11,706                  | 4,229        | 23,061        | 787                                       | 1,410        | 56        |
| TNBC            | 2         | 14,299                | 16,505              | 8,887                   | 2,534        | 17,773        | 201                                       | 407          | 49        |
| TNBC            | 3         | 17,226                | 21,160              | 6,827                   | 2,146        | 24,670        | 57                                        | 126          | 45        |
| TNBC            | 4         | 9,499                 | 9,277               | 6,191                   | 1,310        | 15,476        | 19                                        | 49           | 39        |
| TNBC            | 5         | 9,662                 | 10,897              | 4,934                   | 3,248        | 12,714        | 7                                         | 20           | 35        |
| TNBC            | 6         | 3,121                 | 3,417               | 2,101                   | 628          | 4,594         | 4                                         | 8            | 50        |
| TNBC            | 7         | 7,280                 |                     | 7,280                   | 7,280        | 7,280         | 1                                         | 4            | 25        |
| <b>TNBC</b>     | <b>AI</b> | <b>19,392</b>         | <b>23,616</b>       | <b>13,036</b>           | <b>4,443</b> | <b>26,411</b> | <b>840</b>                                | <b>1,425</b> | <b>59</b> |

**eTable 10.** Annual Median Medicare Anticancer Drug Costs for Patients by Year After Diagnosis and Subgroup

| Subgroup        | Year       | Median(USD))   | Q1(USD)       | Q3(USD)        |
|-----------------|------------|----------------|---------------|----------------|
| HR+HER2-        | 1          | 13,179         | 959           | 88,364         |
| HR+HER2-        | 2          | 13,006         | 2,379         | 63,396         |
| HR+HER2-        | 3          | 16,088         | 2,876         | 64,673         |
| HR+HER2-        | 4          | 19,361         | 3,515         | 68,073         |
| HR+HER2-        | 5          | 15,805         | 3,239         | 62,356         |
| HR+HER2-        | 6          | 16,178         | 2,605         | 64,055         |
| HR+HER2-        | 7          | 8,690          | 1,598         | 57,775         |
| HR+HER2-        | 8          | 9,879          | 1,985         | 60,158         |
| HR+HER2-        | 9          | 6,173          | 323           | 51,980         |
| HR+HER2-        | 10         | 5,391          | 265           | 48,652         |
| <b>HR+HER2-</b> | <b>All</b> | <b>53,686</b>  | <b>3,261</b>  | <b>168,262</b> |
| HER2+HR+        | 1          | 107,239        | 20,510        | 185,388        |
| HER2+HR+        | 2          | 93,098         | 29,611        | 175,689        |
| HER2+HR+        | 3          | 87,537         | 24,316        | 171,492        |
| HER2+HR+        | 4          | 92,954         | 31,195        | 165,448        |
| HER2+HR+        | 5          | 92,954         | 29,834        | 161,938        |
| HER2+HR+        | 6          | 90,684         | 22,246        | 169,596        |
| HER2+HR+        | 7          | 91,281         | 30,871        | 152,734        |
| HER2+HR+        | 8          | 71,786         | 22,777        | 123,062        |
| HER2+HR+        | 9          | 52,125         | 7,298         | 103,674        |
| HER2+HR+        | 10         | 83,269         | 12,146        | 135,369        |
| <b>HR+HER2+</b> | <b>All</b> | <b>160,764</b> | <b>51,890</b> | <b>390,239</b> |
| HR-HER2+        | 1          | 111,341        | 40,553        | 173,950        |
| HR-HER2+        | 2          | 109,624        | 51,370        | 176,346        |
| HR-HER2+        | 3          | 117,240        | 39,841        | 174,338        |
| HR-HER2+        | 4          | 103,167        | 43,785        | 184,363        |
| HR-HER2+        | 5          | 95,821         | 55,297        | 167,653        |
| HR-HER2+        | 6          | 123,298        | 92,954        | 184,363        |
| HR-HER2+        | 7          | 92,954         | 76,812        | 140,473        |
| HR-HER2+        | 8          | 85,331         | 36,879        | 106,130        |
| HR-HER2+        | 9          | 61,296         | 29,448        | 99,814         |
| HR-HER2+        | 10         | 20,474         | 12,517        | 22,587         |
| <b>HR-HER2+</b> | <b>All</b> | <b>203,789</b> | <b>51,386</b> | <b>450,590</b> |
| TNBC            | 1          | 3,240          | 689           | 30,749         |
| TNBC            | 2          | 12,549         | 929           | 42,327         |
| TNBC            | 3          | 20,975         | 1,528         | 58,817         |

| <b>Subgroup</b> | <b>Year</b> | <b>Median(USD)</b> | <b>Q1(USD)</b> | <b>Q3(USD)</b> |
|-----------------|-------------|--------------------|----------------|----------------|
| TNBC            | 4           | 18,590             | 371            | 49,019         |
| TNBC            | 5           | 10,744             | 6,574          | 85,191         |
| TNBC            | 6           | 26,473             | 710            | 66,522         |
| TNBC            | 7           | 23,497             | 14,277         | 31,157         |
| TNBC            | 8           | 10,548             | 5,291          | 15,805         |
| <b>TNBC</b>     | <b>All</b>  | <b>8,963</b>       | <b>831</b>     | <b>44,873</b>  |

**eTable 11.** Drugs That Made up the 3 Largest Contributors to Overall Yearly Medicare Costs Stratified by Subgroup and Year After Diagnosis

| Subgroup | Drug Name                 | Route | Year | Patient Count | Total Medicare Cost | Total AWP Cost |
|----------|---------------------------|-------|------|---------------|---------------------|----------------|
| HR+HER2- | palbociclib               | Oral  | 1    | 3362          | 311,752,981         | 402,355,045    |
| HR+HER2- | abemaciclib               | Oral  | 1    | 434           | 32,734,606          | 40,066,241     |
| HR+HER2- | paclitaxel protein-bound  | IV    | 1    | 828           | 30,127,595          | 38,832,217     |
| HR+HER2- | palbociclib               | Oral  | 2    | 1513          | 107,526,084         | 138,775,458    |
| HR+HER2- | abemaciclib               | Oral  | 2    | 234           | 15,192,756          | 18,595,508     |
| HR+HER2- | everolimus                | Oral  | 2    | 526           | 13,966,908          | 39,682,949     |
| HR+HER2- | palbociclib               | Oral  | 3    | 1028          | 69,541,052          | 89,751,166     |
| HR+HER2- | everolimus                | Oral  | 3    | 382           | 10,724,895          | 30,471,702     |
| HR+HER2- | abemaciclib               | Oral  | 3    | 149           | 9,611,258           | 11,763,911     |
| HR+HER2- | palbociclib               | Oral  | 4    | 701           | 48,551,598          | 62,661,727     |
| HR+HER2- | everolimus                | Oral  | 4    | 224           | 6,130,542           | 17,418,171     |
| HR+HER2- | eribulin                  | IV    | 4    | 168           | 5,201,342           | 6,285,427      |
| HR+HER2- | palbociclib               | Oral  | 5    | 436           | 29,081,388          | 37,533,059     |
| HR+HER2- | eribulin                  | IV    | 5    | 108           | 3,401,879           | 4,110,912      |
| HR+HER2- | abemaciclib               | Oral  | 5    | 80            | 3,254,807           | 3,983,792      |
| HR+HER2- | palbociclib               | Oral  | 6    | 235           | 14,830,870          | 19,141,037     |
| HR+HER2- | abemaciclib               | Oral  | 6    | 59            | 3,404,311           | 4,166,782      |
| HR+HER2- | everolimus                | Oral  | 6    | 73            | 2,177,058           | 6,185,483      |
| HR+HER2- | palbociclib               | Oral  | 7    | 129           | 9,186,223           | 11,855,936     |
| HR+HER2- | abemaciclib               | Oral  | 7    | 34            | 1,754,276           | 2,147,185      |
| HR+HER2- | everolimus                | Oral  | 7    | 36            | 901,954             | 2,562,644      |
| HR+HER2- | palbociclib               | Oral  | 8    | 59            | 3,885,795           | 5,015,089      |
| HR+HER2- | abemaciclib               | Oral  | 8    | 17            | 950,519             | 1,163,408      |
| HR+HER2- | alpelisib                 | Oral  | 8    | 20            | 635,239             | 1,463,766      |
| HR+HER2- | palbociclib               | Oral  | 9    | 27            | 1,668,999           | 2,154,046      |
| HR+HER2- | abemaciclib               | Oral  | 9    | 10            | 869,137             | 1,063,800      |
| HR+HER2- | alpelisib                 | Oral  | 9    | 6             | 312,738             | 720,635        |
| HR+HER2- | palbociclib               | Oral  | 10   | 12            | 1,113,390           | 1,436,964      |
| HR+HER2- | alpelisib                 | Oral  | 10   | 5             | 182,892             | 421,433        |
| HR+HER2- | everolimus                | Oral  | 10   | 2             | 86,713              | 246,369        |
| HR-HER2+ | trastuzumab               | IV    | 1    | 566           | 44,562,871          | 61,861,038     |
| HR-HER2+ | pertuzumab                | IV    | 1    | 415           | 27,370,770          | 31,900,117     |
| HR-HER2+ | ado-trastuzumab emtansine | IV    | 1    | 144           | 9,445,039           | 10,929,682     |
| HR-HER2+ | trastuzumab               | IV    | 2    | 292           | 20,220,947          | 28,070,201     |
| HR-HER2+ | pertuzumab                | IV    | 2    | 188           | 13,414,923          | 15,634,840     |
| HR-HER2+ | ado-trastuzumab emtansine | IV    | 2    | 125           | 9,424,529           | 10,905,948     |
| HR-HER2+ | trastuzumab               | IV    | 3    | 156           | 11,957,437          | 16,599,008     |

| Subgroup | Drug Name                 | Route | Year | Patient Count | Total Medicare Cost | Total AWP Cost |
|----------|---------------------------|-------|------|---------------|---------------------|----------------|
| HR-HER2+ | pertuzumab                | IV    | 3    | 105           | 7,772,228           | 9,058,386      |
| HR-HER2+ | ado-trastuzumab emtansine | IV    | 3    | 85            | 6,799,198           | 7,867,947      |
| HR-HER2+ | trastuzumab               | IV    | 4    | 87            | 7,428,268           | 10,311,731     |
| HR-HER2+ | pertuzumab                | IV    | 4    | 53            | 4,543,764           | 5,295,672      |
| HR-HER2+ | ado-trastuzumab emtansine | IV    | 4    | 43            | 4,225,142           | 4,889,282      |
| HR-HER2+ | trastuzumab               | IV    | 5    | 60            | 4,693,523           | 6,515,428      |
| HR-HER2+ | pertuzumab                | IV    | 5    | 40            | 2,932,379           | 3,417,633      |
| HR-HER2+ | ado-trastuzumab emtansine | IV    | 5    | 23            | 2,061,295           | 2,385,305      |
| HR-HER2+ | trastuzumab               | IV    | 6    | 37            | 2,680,858           | 3,721,499      |
| HR-HER2+ | pertuzumab                | IV    | 6    | 25            | 2,135,228           | 2,488,568      |
| HR-HER2+ | ado-trastuzumab emtansine | IV    | 6    | 16            | 1,753,639           | 2,029,289      |
| HR-HER2+ | trastuzumab               | IV    | 7    | 20            | 1,423,953           | 1,976,696      |
| HR-HER2+ | ado-trastuzumab emtansine | IV    | 7    | 13            | 1,199,858           | 1,388,461      |
| HR-HER2+ | pertuzumab                | IV    | 7    | 13            | 990,746             | 1,154,695      |
| HR-HER2+ | trastuzumab               | IV    | 8    | 10            | 792,133             | 1,099,619      |
| HR-HER2+ | ado-trastuzumab emtansine | IV    | 8    | 6             | 553,781             | 640,828        |
| HR-HER2+ | pertuzumab                | IV    | 8    | 4             | 381,494             | 444,624        |
| HR-HER2+ | trastuzumab               | IV    | 9    | 8             | 432,440             | 600,302        |
| HR-HER2+ | ado-trastuzumab emtansine | IV    | 9    | 2             | 276,890             | 320,414        |
| HR-HER2+ | pertuzumab                | IV    | 9    | 4             | 261,921             | 305,264        |
| HR-HER2+ | trastuzumab               | IV    | 10   | 3             | 57,928              | 80,414         |
| HR-HER2+ | trastuzumab-anns          | IV    | 10   | 3             | 43,876              | 89,764         |
| HR-HER2+ | ado-trastuzumab emtansine | IV    | 10   | 2             | 20,510              | 23,734         |
| HR+HER2+ | trastuzumab               | IV    | 1    | 1595          | 167,413,542         | 232,399,197    |
| HR+HER2+ | pertuzumab                | IV    | 1    | 1206          | 107,216,890         | 124,959,269    |
| HR+HER2+ | palbociclib               | Oral  | 1    | 280           | 22,634,580          | 29,212,672     |
| HR+HER2+ | trastuzumab               | IV    | 2    | 1001          | 89,338,594          | 124,017,552    |
| HR+HER2+ | pertuzumab                | IV    | 2    | 667           | 53,335,136          | 62,161,098     |
| HR+HER2+ | ado-trastuzumab emtansine | IV    | 2    | 378           | 27,760,826          | 32,124,483     |
| HR+HER2+ | trastuzumab               | IV    | 3    | 609           | 53,541,726          | 74,325,254     |
| HR+HER2+ | pertuzumab                | IV    | 3    | 373           | 29,853,327          | 34,793,492     |
| HR+HER2+ | ado-trastuzumab emtansine | IV    | 3    | 284           | 22,007,659          | 25,466,990     |
| HR+HER2+ | trastuzumab               | IV    | 4    | 386           | 31,205,730          | 43,318,996     |
| HR+HER2+ | pertuzumab                | IV    | 4    | 208           | 16,711,714          | 19,477,188     |
| HR+HER2+ | ado-trastuzumab emtansine | IV    | 4    | 184           | 16,192,961          | 18,738,293     |
| HR+HER2+ | trastuzumab               | IV    | 5    | 224           | 16,929,823          | 23,501,547     |
| HR+HER2+ | pertuzumab                | IV    | 5    | 130           | 9,326,674           | 10,870,063     |
| HR+HER2+ | ado-trastuzumab emtansine | IV    | 5    | 104           | 8,870,748           | 10,265,119     |
| HR+HER2+ | trastuzumab               | IV    | 6    | 130           | 10,828,512          | 15,031,864     |

| Subgroup | Drug Name                       | Route | Year | Patient Count | Total Medicare Cost | Total AWP Cost |
|----------|---------------------------------|-------|------|---------------|---------------------|----------------|
| HR+HER2+ | pertuzumab                      | IV    | 6    | 80            | 6,001,413           | 6,994,534      |
| HR+HER2+ | ado-trastuzumab emtansine       | IV    | 6    | 59            | 5,906,995           | 6,835,501      |
| HR+HER2+ | trastuzumab                     | IV    | 7    | 80            | 6,136,337           | 8,518,306      |
| HR+HER2+ | ado-trastuzumab emtansine       | IV    | 7    | 32            | 3,404,726           | 3,939,907      |
| HR+HER2+ | pertuzumab                      | IV    | 7    | 49            | 3,131,667           | 3,649,899      |
| HR+HER2+ | ado-trastuzumab emtansine       | IV    | 8    | 17            | 2,409,972           | 2,788,790      |
| HR+HER2+ | trastuzumab                     | IV    | 8    | 39            | 2,366,969           | 3,285,766      |
| HR+HER2+ | pertuzumab                      | IV    | 8    | 17            | 1,360,852           | 1,586,047      |
| HR+HER2+ | trastuzumab                     | IV    | 9    | 16            | 835,242             | 1,159,462      |
| HR+HER2+ | ado-trastuzumab emtansine       | IV    | 9    | 8             | 758,885             | 878,172        |
| HR+HER2+ | pertuzumab                      | IV    | 9    | 8             | 449,821             | 524,258        |
| HR+HER2+ | ado-trastuzumab emtansine       | IV    | 10   | 4             | 399,953             | 462,820        |
| HR+HER2+ | palbociclib                     | Oral  | 10   | 3             | 378,075             | 487,952        |
| HR+HER2+ | pertuzumab                      | IV    | 10   | 3             | 153,736             | 179,177        |
| TNBC     | paclitaxel protein-bound        | IV    | 1    | 370           | 12,477,853          | 16,083,019     |
| TNBC     | atezolizumab                    | IV    | 1    | 141           | 8,018,602           | 9,521,740      |
| TNBC     | eribulin                        | IV    | 1    | 206           | 4,967,114           | 6,002,381      |
| TNBC     | paclitaxel protein-bound        | IV    | 2    | 104           | 2,944,908           | 3,795,767      |
| TNBC     | sacituzumab govitecan-hziy      | IV    | 2    | 22            | 2,622,586           | 3,074,496      |
| TNBC     | atezolizumab                    | IV    | 2    | 39            | 2,331,223           | 2,768,225      |
| TNBC     | sacituzumab govitecan-hziy      | IV    | 3    | 13            | 1,420,567           | 1,665,352      |
| TNBC     | paclitaxel protein-bound        | IV    | 3    | 36            | 1,233,145           | 1,589,432      |
| TNBC     | eribulin                        | IV    | 3    | 23            | 684,094             | 826,675        |
| TNBC     | paclitaxel protein-bound        | IV    | 4    | 11            | 777,050             | 1,001,560      |
| TNBC     | nivolumab                       | IV    | 4    | 4             | 720,420             | 846,062        |
| TNBC     | atezolizumab                    | IV    | 4    | 6             | 710,085             | 843,195        |
| TNBC     | nivolumab                       | IV    | 5    | 2             | 630,368             | 740,304        |
| TNBC     | paclitaxel protein-bound        | IV    | 5    | 9             | 270,278             | 348,369        |
| TNBC     | atezolizumab                    | IV    | 5    | 4             | 247,860             | 294,323        |
| TNBC     | nivolumab                       | IV    | 6    | 2             | 187,032             | 219,651        |
| TNBC     | olaparib                        | Oral  | 6    | 2             | 103,408             | 234,652        |
| TNBC     | sacituzumab govitecan-hziy      | IV    | 6    | 1             | 54,637              | 64,052         |
| TNBC     | olaparib                        | Oral  | 7    | 1             | 28,272              | 64,154         |
| TNBC     | paclitaxel protein-bound        | IV    | 7    | 1             | 28,154              | 36,288         |
| TNBC     | doxorubicin pegylated liposomal | IV    | 7    | 1             | 18,722              | 38,720         |
| TNBC     | doxorubicin pegylated liposomal | IV    | 8    | 1             | 21,063              | 43,560         |
| TNBC     | letrozole                       | Oral  | 8    | 1             | 33                  | 1,342          |

**eTable 12.** Lines That Made up the 3 Largest Contributors to Medicare Costs by Calendar Year Stratified by Subgroup

| Year | Sub group | Line Name                         | Mean Medicare Price | Mean AWP price |
|------|-----------|-----------------------------------|---------------------|----------------|
| 2011 | HR+HER2-  | Paclitaxel Protein-Bound          | 31,157              | 40,159         |
| 2011 | HR+HER2-  | Eribulin                          | 20,448              | 24,710         |
| 2011 | HR+HER2-  | Fulvestrant                       | 6,465               | 47,073         |
| 2011 | HR-HER2+  | Eribulin,Lapatinib                | 208,202             | 251,597        |
| 2011 | HR-HER2+  | Carboplatin,Docetaxel,Trastuzumab | 123,958             | 179,022        |
| 2011 | HR-HER2+  | Paclitaxel,Trastuzumab            | 98,897              | 138,221        |
| 2011 | HR+HER2+  | Exemestane,Trastuzumab            | 215,765             | 307,483        |
| 2011 | HR+HER2+  | Letrozole,Trastuzumab             | 205,278             | 287,287        |
| 2011 | HR+HER2+  | Fulvestrant,Trastuzumab           | 156,917             | 245,449        |
| 2011 | TNBC      | Paclitaxel Protein-Bound          | 45,046              | 58,061         |
| 2011 | TNBC      | Capecitabine,Ixabepilone          | 30,365              | 39,766         |
| 2011 | TNBC      | Eribulin                          | 29,743              | 35,942         |
| 2012 | HR+HER2-  | Eribulin                          | 47,802              | 57,765         |
| 2012 | HR+HER2-  | Everolimus,Exemestane             | 47,206              | 134,555        |
| 2012 | HR+HER2-  | Paclitaxel Protein-Bound          | 36,427              | 46,952         |



| Year | Sub group | Line Name                                   | Mean Medicare Price | Mean AWP price |
|------|-----------|---------------------------------------------|---------------------|----------------|
| 2012 | HR-HER2+  | Pertuzumab,Trastuzumab,Vinorelbine          | 545,173             | 694,510        |
| 2012 | HR-HER2+  | Paclitaxel,Pertuzumab,Trastuzumab           | 440,974             | 589,099        |
| 2012 | HR-HER2+  | Docetaxel,Pertuzumab,Trastuzumab            | 428,990             | 569,737        |
| 2012 | HR+HER2+  | Docetaxel,Paclitaxel,Pertuzumab,Trastuzumab | 434,550             | 558,304        |
| 2012 | HR+HER2+  | Letrozole,Pertuzumab,Trastuzumab            | 422,640             | 537,941        |
| 2012 | HR+HER2+  | Docetaxel,Pertuzumab,Trastuzumab            | 314,292             | 419,709        |
| 2012 | TNBC      | Paclitaxel,Paclitaxel Protein-Bound         | 59,915              | 78,639         |
| 2012 | TNBC      | Capecitabine,Ixabepilone                    | 49,257              | 78,302         |
| 2012 | TNBC      | Carboplatin,Paclitaxel Protein-Bound        | 33,987              | 44,189         |
| 2013 | HR+HER2-  | Everolimus,Exemestane                       | 68,629              | 195,585        |
| 2013 | HR+HER2-  | Ixabepilone                                 | 50,452              | 59,670         |
| 2013 | HR+HER2-  | Paclitaxel Protein-Bound                    | 35,087              | 45,224         |
| 2013 | HR-HER2+  | Paclitaxel,Pertuzumab,Trastuzumab           | 410,009             | 523,221        |
| 2013 | HR-HER2+  | Docetaxel,Paclitaxel,Pertuzumab,Trastuzumab | 370,305             | 485,686        |
| 2013 | HR-HER2+  | Docetaxel,Pertuzumab,Trastuzumab            | 314,649             | 414,364        |
| 2013 | HR+HER2+  | Ado-Trastuzumab Emtansine,Anastrozole       | 1,066,541           | 1,234,188      |

| Year | Sub group | Line Name                                       | Mean Medicare Price | Mean AWP price |
|------|-----------|-------------------------------------------------|---------------------|----------------|
| 2013 | HR+HER2+  | Letrozole,Pertuzumab,Trastuzumab                | 771,481             | 1,011,517      |
| 2013 | HR+HER2+  | Ado-Trastuzumab Emtansine,Tamoxifen             | 358,932             | 415,352        |
| 2013 | TNBC      | Paclitaxel Protein-Bound                        | 56,091              | 72,298         |
| 2013 | TNBC      | Carboplatin,Paclitaxel Protein-Bound            | 51,123              | 66,734         |
| 2013 | TNBC      | Capecitabine,Ixabepilone                        | 44,157              | 70,005         |
| 2014 | HR+HER2-  | Letrozole,Palbociclib                           | 358,259             | 476,732        |
| 2014 | HR+HER2-  | Ixabepilone                                     | 100,904             | 119,340        |
| 2014 | HR+HER2-  | Everolimus,Exemestane                           | 55,579              | 158,362        |
| 2014 | HR-HER2+  | Carboplatin,Docetaxel,Pertuzumab,Trastuzumab    | 502,893             | 650,544        |
| 2014 | HR-HER2+  | Docetaxel,Pertuzumab,Trastuzumab                | 399,835             | 525,215        |
| 2014 | HR-HER2+  | Paclitaxel Protein-Bound,Pertuzumab,Trastuzumab | 354,506             | 461,727        |
| 2014 | HR+HER2+  | Docetaxel,Letrozole,Pertuzumab,Trastuzumab      | 432,433             | 594,426        |
| 2014 | HR+HER2+  | Pertuzumab,Trastuzumab                          | 383,721             | 494,738        |
| 2014 | HR+HER2+  | Pertuzumab,Tamoxifen,Trastuzumab                | 314,967             | 409,193        |
| 2014 | TNBC      | Capecitabine,Ixabepilone                        | 36,805              | 52,884         |
| 2014 | TNBC      | Carboplatin,Paclitaxel Protein-Bound            | 32,594              | 42,419         |

| Year | Sub group | Line Name                                    | Mean Medicare Price | Mean AWP price |
|------|-----------|----------------------------------------------|---------------------|----------------|
| 2014 | TNBC      | Paclitaxel Protein-Bound                     | 32,429              | 41,799         |
| 2015 | HR+HER2-  | Anastrozole,Palbociclib                      | 264,873             | 341,964        |
| 2015 | HR+HER2-  | Letrozole,Palbociclib                        | 210,672             | 280,432        |
| 2015 | HR+HER2-  | Fulvestrant,Palbociclib                      | 163,205             | 246,201        |
| 2015 | HR-HER2+  | Capecitabine,Pertuzumab,Trastuzumab          | 411,709             | 523,339        |
| 2015 | HR-HER2+  | Docetaxel,Pertuzumab,Trastuzumab             | 288,608             | 379,625        |
| 2015 | HR-HER2+  | Carboplatin,Docetaxel,Pertuzumab,Trastuzumab | 211,403             | 285,098        |
| 2015 | HR+HER2+  | Docetaxel,Letrozole,Pertuzumab,Trastuzumab   | 629,583             | 831,800        |
| 2015 | HR+HER2+  | Ado-Trastuzumab Emtansine,Letrozole          | 548,653             | 634,895        |
| 2015 | HR+HER2+  | Pertuzumab,Tamoxifen,Trastuzumab             | 389,718             | 497,386        |
| 2015 | TNBC      | Carboplatin,Paclitaxel Protein-Bound         | 78,098              | 101,050        |
| 2015 | TNBC      | Paclitaxel,Paclitaxel Protein-Bound          | 68,001              | 88,419         |
| 2015 | TNBC      | Nivolumab                                    | 48,490              | 56,946         |
| 2016 | HR+HER2-  | Letrozole,Palbociclib                        | 239,605             | 319,690        |
| 2016 | HR+HER2-  | Fulvestrant,Palbociclib                      | 144,915             | 218,649        |
| 2016 | HR+HER2-  | Anastrozole,Palbociclib                      | 144,472             | 188,814        |

| Year | Sub group | Line Name                                       | Mean Medicare Price | Mean AWP price |
|------|-----------|-------------------------------------------------|---------------------|----------------|
| 2016 | HR-HER2+  | Docetaxel,Paclitaxel,Pertuzumab,Trastuzumab     | 561,644             | 721,835        |
| 2016 | HR-HER2+  | Docetaxel,Pertuzumab,Trastuzumab                | 277,144             | 366,130        |
| 2016 | HR-HER2+  | Capecitabine,Pertuzumab,Trastuzumab             | 253,166             | 416,923        |
| 2016 | HR+HER2+  | Docetaxel,Letrozole,Pertuzumab,Trastuzumab      | 378,275             | 510,077        |
| 2016 | HR+HER2+  | Letrozole,Pertuzumab,Trastuzumab                | 342,007             | 445,316        |
| 2016 | HR+HER2+  | Pertuzumab,Tamoxifen,Trastuzumab                | 311,924             | 399,708        |
| 2016 | TNBC      | Capecitabine,Ixabepilone                        | 65,872              | 89,620         |
| 2016 | TNBC      | Ixabepilone                                     | 41,803              | 49,441         |
| 2016 | TNBC      | Olaparib                                        | 34,894              | 79,181         |
| 2017 | HR+HER2-  | Letrozole,Palbociclib                           | 211,639             | 282,397        |
| 2017 | HR+HER2-  | Anastrozole,Palbociclib                         | 188,821             | 248,107        |
| 2017 | HR+HER2-  | Fulvestrant,Palbociclib                         | 138,888             | 212,153        |
| 2017 | HR-HER2+  | Pertuzumab,Trastuzumab,Vinorelbine              | 349,281             | 451,556        |
| 2017 | HR-HER2+  | Paclitaxel Protein-Bound,Pertuzumab,Trastuzumab | 319,479             | 411,491        |
| 2017 | HR-HER2+  | Docetaxel,Paclitaxel,Pertuzumab,Trastuzumab     | 314,571             | 437,197        |
| 2017 | HR+HER2+  | Letrozole,Pertuzumab,Trastuzumab                | 354,785             | 466,080        |

| Year | Sub group | Line Name                                    | Mean Medicare Price | Mean AWP price |
|------|-----------|----------------------------------------------|---------------------|----------------|
| 2017 | HR+HER2+  | Anastrozole,Docetaxel,Pertuzumab,Trastuzumab | 327,820             | 442,163        |
| 2017 | HR+HER2+  | Docetaxel,Paclitaxel,Pertuzumab,Trastuzumab  | 275,844             | 366,050        |
| 2017 | TNBC      | Capecitabine,Ixabepilone                     | 50,936              | 80,169         |
| 2017 | TNBC      | Carboplatin,Paclitaxel Protein-Bound         | 49,116              | 63,901         |
| 2017 | TNBC      | Paclitaxel Protein-Bound                     | 47,080              | 60,682         |
| 2018 | HR+HER2-  | Letrozole,Palbociclib                        | 213,247             | 283,797        |
| 2018 | HR+HER2-  | Anastrozole,Palbociclib                      | 164,683             | 216,731        |
| 2018 | HR+HER2-  | Abemaciclib,Fulvestrant                      | 126,813             | 182,099        |
| 2018 | HR-HER2+  | Docetaxel,Pertuzumab,Trastuzumab-Anns        | 419,972             | 595,294        |
| 2018 | HR-HER2+  | Carboplatin,Docetaxel,Pertuzumab,Trastuzumab | 234,090             | 317,829        |
| 2018 | HR-HER2+  | Ixabepilone                                  | 211,899             | 250,614        |
| 2018 | HR+HER2+  | Exemestane,Pertuzumab,Trastuzumab            | 264,641             | 344,067        |
| 2018 | HR+HER2+  | Anastrozole,Pertuzumab,Trastuzumab           | 223,155             | 291,696        |
| 2018 | HR+HER2+  | Fulvestrant,Pertuzumab,Trastuzumab           | 210,446             | 297,769        |
| 2018 | TNBC      | Pembrolizumab                                | 52,754              | 60,404         |
| 2018 | TNBC      | Ixabepilone                                  | 45,407              | 53,703         |

| Year | Sub group | Line Name                                       | Mean Medicare Price | Mean AWP price |
|------|-----------|-------------------------------------------------|---------------------|----------------|
| 2018 | TNBC      | Atezolizumab,Paclitaxel Protein-Bound           | 43,688              | 53,592         |
| 2019 | HR+HER2-  | Letrozole,Palbociclib                           | 164,099             | 218,146        |
| 2019 | HR+HER2-  | Anastrozole,Palbociclib                         | 155,259             | 204,567        |
| 2019 | HR+HER2-  | Abemaciclib,Fulvestrant                         | 141,452             | 201,117        |
| 2019 | HR-HER2+  | Paclitaxel,Pertuzumab,Trastuzumab-Anns          | 372,235             | 518,503        |
| 2019 | HR-HER2+  | Docetaxel,Pertuzumab,Trastuzumab-Anns           | 218,006             | 329,683        |
| 2019 | HR-HER2+  | Paclitaxel Protein-Bound,Pertuzumab,Trastuzumab | 195,856             | 250,927        |
| 2019 | HR+HER2+  | Docetaxel,Letrozole,Pertuzumab,Trastuzumab      | 217,177             | 284,371        |
| 2019 | HR+HER2+  | Docetaxel,Pertuzumab,Trastuzumab-Anns           | 177,295             | 257,371        |
| 2019 | HR+HER2+  | Exemestane,Pertuzumab,Trastuzumab               | 158,969             | 205,530        |
| 2019 | TNBC      | Atezolizumab,Paclitaxel Protein-Bound           | 116,310             | 142,506        |
| 2019 | TNBC      | Nivolumab,Olaparib,Paclitaxel Protein-Bound     | 41,785              | 50,685         |
| 2019 | TNBC      | Paclitaxel Protein-Bound                        | 41,605              | 53,626         |
| 2020 | HR+HER2-  | Letrozole,Palbociclib                           | 100,259             | 133,358        |
| 2020 | HR+HER2-  | Anastrozole,Palbociclib                         | 90,021              | 118,205        |
| 2020 | HR+HER2-  | Abemaciclib,Fulvestrant                         | 70,506              | 102,399        |

| <b>Year</b> | <b>Sub group</b> | <b>Line Name</b>                        | <b>Mean Medicare Price</b> | <b>Mean AWP price</b> |
|-------------|------------------|-----------------------------------------|----------------------------|-----------------------|
| 2020        | HR-HER2+         | Capecitabine,Trastuzumab,Tucatinib      | 212,009                    | 282,427               |
| 2020        | HR-HER2+         | Capecitabine,Trastuzumab-Anns,Tucatinib | 178,206                    | 244,258               |
| 2020        | HR-HER2+         | Alpelisib,Paclitaxel Protein-Bound      | 172,880                    | 318,323               |
| 2020        | HR+HER2+         | Pertuzumab,Trastuzumab                  | 173,280                    | 220,255               |
| 2020        | HR+HER2+         | Letrozole,Pertuzumab,Trastuzumab        | 164,676                    | 218,399               |
| 2020        | HR+HER2+         | Ado-Trastuzumab Emtansine,Exemestane    | 143,999                    | 167,530               |
| 2020        | TNBC             | Sacituzumab Govitecan-Hziy              | 154,805                    | 181,481               |
| 2020        | TNBC             | Atezolizumab,Paclitaxel Protein-Bound   | 100,892                    | 123,626               |
| 2020        | TNBC             | Capecitabine,Sacituzumab Govitecan-Hziy | 71,028                     | 83,268                |

**eTable 13.** Mean Medicare and AWP Costs by Year After Diagnosis Stratified by Year of Diagnosis

| SG       | Y | YoD  | Societal Perspective (Medicare) |            |        | Payor Perspective (AWP) |            |         |
|----------|---|------|---------------------------------|------------|--------|-------------------------|------------|---------|
|          |   |      | Anti-Cancer                     | Supportive | Total  | Anti-Cancer             | Supportive | Total   |
| HR+HER2- | 1 | 2011 | 8,889                           | 4,097      | 12,986 | 23,661                  | 12,248     | 35,909  |
| HR+HER2- | 1 | 2012 | 9,105                           | 4,350      | 13,455 | 26,490                  | 12,933     | 39,423  |
| HR+HER2- | 1 | 2013 | 10,601                          | 3,902      | 14,503 | 28,548                  | 11,443     | 39,990  |
| HR+HER2- | 1 | 2014 | 13,404                          | 2,881      | 16,284 | 32,139                  | 8,472      | 40,611  |
| HR+HER2- | 1 | 2015 | 39,875                          | 3,459      | 43,334 | 64,266                  | 9,941      | 74,207  |
| HR+HER2- | 1 | 2016 | 54,894                          | 2,823      | 57,716 | 84,521                  | 8,440      | 92,961  |
| HR+HER2- | 1 | 2017 | 62,073                          | 2,953      | 65,026 | 97,417                  | 9,044      | 106,461 |
| HR+HER2- | 1 | 2018 | 71,137                          | 2,154      | 73,292 | 111,352                 | 6,359      | 117,710 |
| HR+HER2- | 1 | 2019 | 78,112                          | 2,451      | 80,563 | 120,926                 | 6,756      | 127,682 |
| HR+HER2- | 2 | 2011 | 17,687                          | 4,481      | 22,168 | 42,754                  | 12,766     | 55,520  |
| HR+HER2- | 2 | 2012 | 15,966                          | 3,894      | 19,861 | 42,918                  | 10,942     | 53,860  |
| HR+HER2- | 2 | 2013 | 18,122                          | 3,411      | 21,534 | 45,147                  | 8,994      | 54,141  |
| HR+HER2- | 2 | 2014 | 31,640                          | 2,578      | 34,218 | 62,348                  | 7,822      | 70,170  |
| HR+HER2- | 2 | 2015 | 39,924                          | 3,734      | 43,658 | 68,877                  | 10,274     | 79,151  |
| HR+HER2- | 2 | 2016 | 45,157                          | 2,645      | 47,802 | 78,574                  | 7,647      | 86,221  |
| HR+HER2- | 2 | 2017 | 48,753                          | 2,216      | 50,969 | 86,057                  | 6,461      | 92,518  |
| HR+HER2- | 2 | 2018 | 50,724                          | 1,765      | 52,489 | 89,628                  | 4,710      | 94,338  |
| HR+HER2- | 3 | 2011 | 17,861                          | 3,279      | 21,140 | 45,440                  | 9,136      | 54,576  |
| HR+HER2- | 3 | 2012 | 20,142                          | 4,304      | 24,446 | 52,581                  | 12,836     | 65,417  |
| HR+HER2- | 3 | 2013 | 33,344                          | 3,207      | 36,551 | 64,818                  | 8,054      | 72,872  |
| HR+HER2- | 3 | 2014 | 36,521                          | 2,436      | 38,957 | 68,994                  | 7,116      | 76,109  |
| HR+HER2- | 3 | 2015 | 41,068                          | 3,228      | 44,296 | 74,197                  | 9,123      | 83,320  |
| HR+HER2- | 3 | 2016 | 43,430                          | 3,303      | 46,733 | 77,913                  | 8,559      | 86,472  |
| HR+HER2- | 3 | 2017 | 51,150                          | 2,486      | 53,636 | 93,622                  | 6,955      | 100,576 |
| HR+HER2- | 4 | 2011 | 18,266                          | 3,673      | 21,939 | 48,207                  | 10,672     | 58,878  |
| HR+HER2- | 4 | 2012 | 32,104                          | 4,420      | 36,524 | 64,377                  | 13,370     | 77,747  |
| HR+HER2- | 4 | 2013 | 43,041                          | 5,515      | 48,556 | 78,486                  | 14,922     | 93,408  |
| HR+HER2- | 4 | 2014 | 40,236                          | 3,233      | 43,470 | 76,092                  | 9,551      | 85,643  |
| HR+HER2- | 4 | 2015 | 44,569                          | 2,524      | 47,093 | 81,285                  | 6,592      | 87,877  |
| HR+HER2- | 4 | 2017 | 56,643                          | 1,844      | 58,487 | 97,190                  | 4,969      | 102,159 |
| HR+HER2- | 5 | 2011 | 31,946                          | 5,108      | 37,054 | 62,253                  | 14,077     | 76,330  |
| HR+HER2- | 5 | 2012 | 36,731                          | 2,155      | 38,886 | 69,491                  | 6,512      | 76,003  |
| HR+HER2- | 5 | 2013 | 37,029                          | 4,882      | 41,911 | 70,426                  | 13,690     | 84,115  |
| HR+HER2- | 5 | 2014 | 42,717                          | 2,430      | 45,148 | 77,393                  | 7,417      | 84,809  |



| SG       | Y | YoD  | Societal Perspective (Medicare) |            |         | Payor Perspective (AWP) |            |         |
|----------|---|------|---------------------------------|------------|---------|-------------------------|------------|---------|
|          |   |      | Anti-Cancer                     | Supportive | Total   | Anti-Cancer             | Supportive | Total   |
| HR+HER2- | 5 | 2017 | 18,196                          | 633        | 18,830  | 30,380                  | 1,571      | 31,950  |
| HR-HER2+ | 1 | 2011 | 121,890                         | 10,060     | 131,950 | 185,065                 | 31,056     | 216,120 |
| HR-HER2+ | 1 | 2012 | 108,071                         | 7,907      | 115,977 | 163,173                 | 25,868     | 189,041 |
| HR-HER2+ | 1 | 2013 | 116,586                         | 7,499      | 124,084 | 164,681                 | 23,997     | 188,678 |
| HR-HER2+ | 1 | 2014 | 124,860                         | 10,844     | 135,703 | 165,962                 | 36,090     | 202,052 |
| HR-HER2+ | 1 | 2015 | 116,273                         | 10,080     | 126,353 | 156,072                 | 28,622     | 184,694 |
| HR-HER2+ | 1 | 2016 | 119,194                         | 8,448      | 127,642 | 159,203                 | 26,979     | 186,183 |
| HR-HER2+ | 1 | 2017 | 121,404                         | 9,871      | 131,275 | 163,517                 | 30,866     | 194,383 |
| HR-HER2+ | 1 | 2018 | 125,899                         | 9,685      | 135,584 | 172,905                 | 32,846     | 205,752 |
| HR-HER2+ | 1 | 2019 | 108,612                         | 6,839      | 115,451 | 152,937                 | 20,839     | 173,776 |
| HR-HER2+ | 2 | 2011 | 84,433                          | 5,994      | 90,427  | 137,201                 | 16,073     | 153,275 |
| HR-HER2+ | 2 | 2012 | 91,753                          | 2,374      | 94,127  | 129,770                 | 6,851      | 136,621 |
| HR-HER2+ | 2 | 2013 | 123,718                         | 2,598      | 126,317 | 168,413                 | 8,326      | 176,739 |
| HR-HER2+ | 2 | 2014 | 144,344                         | 4,722      | 149,066 | 193,598                 | 14,348     | 207,947 |
| HR-HER2+ | 2 | 2015 | 121,235                         | 1,946      | 123,181 | 159,833                 | 4,662      | 164,495 |
| HR-HER2+ | 2 | 2016 | 131,992                         | 2,719      | 134,711 | 172,881                 | 7,488      | 180,370 |
| HR-HER2+ | 2 | 2017 | 110,570                         | 3,474      | 114,045 | 153,621                 | 10,176     | 163,797 |
| HR-HER2+ | 2 | 2018 | 124,754                         | 3,957      | 128,711 | 174,801                 | 12,747     | 187,548 |
| HR-HER2+ | 3 | 2011 | 74,759                          | 2,551      | 77,310  | 100,900                 | 6,957      | 107,857 |
| HR-HER2+ | 3 | 2012 | 122,564                         | 2,734      | 125,297 | 164,497                 | 6,982      | 171,479 |
| HR-HER2+ | 3 | 2013 | 117,359                         | 2,369      | 119,728 | 158,434                 | 6,977      | 165,412 |
| HR-HER2+ | 3 | 2014 | 166,348                         | 3,920      | 170,268 | 218,380                 | 11,863     | 230,243 |
| HR-HER2+ | 3 | 2015 | 112,990                         | 1,754      | 114,744 | 160,938                 | 4,535      | 165,473 |
| HR-HER2+ | 3 | 2016 | 129,355                         | 1,902      | 131,257 | 174,767                 | 6,354      | 181,121 |
| HR-HER2+ | 3 | 2017 | 108,294                         | 3,338      | 111,632 | 155,782                 | 5,706      | 161,487 |
| HR-HER2+ | 4 | 2011 | 101,939                         | 3,843      | 105,783 | 141,286                 | 11,434     | 152,719 |
| HR-HER2+ | 4 | 2012 | 91,852                          | 533        | 92,385  | 122,451                 | 653        | 123,104 |
| HR-HER2+ | 4 | 2013 | 124,239                         | 1,268      | 125,507 | 172,981                 | 3,371      | 176,352 |
| HR-HER2+ | 4 | 2014 | 163,429                         | 5,983      | 169,413 | 213,456                 | 19,312     | 232,767 |
| HR-HER2+ | 4 | 2015 | 114,058                         | 254        | 114,312 | 165,095                 | 447        | 165,542 |
| HR-HER2+ | 4 | 2017 | 140,982                         | 1,142      | 142,124 | 192,724                 | 1,577      | 194,302 |
| HR-HER2+ | 5 | 2011 | 44,994                          | 5,005      | 49,999  | 63,475                  | 17,101     | 80,576  |
| HR-HER2+ | 5 | 2012 | 126,190                         | 0          | 126,190 | 174,066                 | 0          | 174,066 |
| HR-HER2+ | 5 | 2013 | 110,645                         | 0          | 110,645 | 154,705                 | 0          | 154,705 |
| HR-HER2+ | 5 | 2014 | 168,496                         | 7,292      | 175,788 | 219,627                 | 22,939     | 242,566 |
| HR-HER2+ | 5 | 2017 | 38,313                          | 0          | 38,313  | 51,440                  | 0          | 51,440  |

| SG       | Y | YoD  | Societal Perspective (Medicare) |            |         | Payor Perspective (AWP) |            |         |
|----------|---|------|---------------------------------|------------|---------|-------------------------|------------|---------|
|          |   |      | Anti-Cancer                     | Supportive | Total   | Anti-Cancer             | Supportive | Total   |
| HR+HER2+ | 1 | 2011 | 94,967                          | 5,030      | 99,997  | 147,527                 | 15,625     | 163,152 |
| HR+HER2+ | 1 | 2012 | 102,269                         | 6,549      | 108,819 | 151,482                 | 20,115     | 171,597 |
| HR+HER2+ | 1 | 2013 | 118,964                         | 8,980      | 127,944 | 166,927                 | 27,527     | 194,454 |
| HR+HER2+ | 1 | 2014 | 117,711                         | 6,017      | 123,728 | 164,122                 | 18,565     | 182,687 |
| HR+HER2+ | 1 | 2015 | 129,105                         | 7,854      | 136,959 | 178,511                 | 23,842     | 202,353 |
| HR+HER2+ | 1 | 2016 | 133,800                         | 6,223      | 140,024 | 184,554                 | 19,897     | 204,451 |
| HR+HER2+ | 1 | 2017 | 152,001                         | 7,490      | 159,491 | 207,108                 | 23,018     | 230,127 |
| HR+HER2+ | 1 | 2018 | 148,827                         | 7,355      | 156,182 | 203,528                 | 22,567     | 226,095 |
| HR+HER2+ | 1 | 2019 | 150,193                         | 6,520      | 156,712 | 208,920                 | 19,437     | 228,357 |
| HR+HER2+ | 2 | 2011 | 88,291                          | 3,000      | 91,291  | 138,440                 | 9,470      | 147,911 |
| HR+HER2+ | 2 | 2012 | 99,274                          | 2,884      | 102,158 | 144,497                 | 7,527      | 152,024 |
| HR+HER2+ | 2 | 2013 | 116,895                         | 2,895      | 119,790 | 162,344                 | 9,164      | 171,508 |
| HR+HER2+ | 2 | 2014 | 114,549                         | 3,333      | 117,882 | 160,534                 | 9,825      | 170,359 |
| HR+HER2+ | 2 | 2015 | 130,446                         | 2,021      | 132,467 | 183,067                 | 5,890      | 188,957 |
| HR+HER2+ | 2 | 2016 | 133,207                         | 2,856      | 136,063 | 185,737                 | 8,708      | 194,445 |
| HR+HER2+ | 2 | 2017 | 125,710                         | 1,903      | 127,613 | 174,835                 | 4,823      | 179,658 |
| HR+HER2+ | 2 | 2018 | 128,019                         | 3,014      | 131,033 | 184,113                 | 7,562      | 191,676 |
| HR+HER2+ | 3 | 2011 | 91,467                          | 2,244      | 93,711  | 135,458                 | 6,262      | 141,720 |
| HR+HER2+ | 3 | 2012 | 97,242                          | 2,402      | 99,644  | 145,159                 | 5,225      | 150,384 |
| HR+HER2+ | 3 | 2013 | 108,986                         | 2,904      | 111,890 | 152,819                 | 8,433      | 161,252 |
| HR+HER2+ | 3 | 2014 | 112,172                         | 4,042      | 116,214 | 156,092                 | 12,412     | 168,504 |
| HR+HER2+ | 3 | 2015 | 127,262                         | 2,343      | 129,605 | 177,727                 | 6,106      | 183,833 |
| HR+HER2+ | 3 | 2016 | 129,455                         | 1,583      | 131,038 | 182,901                 | 4,342      | 187,244 |
| HR+HER2+ | 3 | 2017 | 114,951                         | 1,757      | 116,708 | 163,838                 | 4,456      | 168,294 |
| HR+HER2+ | 4 | 2011 | 97,932                          | 1,314      | 99,246  | 138,823                 | 2,956      | 141,779 |
| HR+HER2+ | 4 | 2012 | 92,723                          | 2,173      | 94,896  | 131,080                 | 4,461      | 135,541 |
| HR+HER2+ | 4 | 2013 | 104,154                         | 3,955      | 108,108 | 145,986                 | 12,533     | 158,519 |
| HR+HER2+ | 4 | 2014 | 127,028                         | 3,049      | 130,077 | 177,405                 | 8,459      | 185,864 |
| HR+HER2+ | 4 | 2015 | 138,731                         | 2,840      | 141,570 | 195,246                 | 6,582      | 201,828 |
| HR+HER2+ | 4 | 2017 | 103,054                         | 1,179      | 104,233 | 143,340                 | 2,812      | 146,152 |
| HR+HER2+ | 5 | 2011 | 90,562                          | 3,189      | 93,751  | 129,862                 | 9,318      | 139,180 |
| HR+HER2+ | 5 | 2012 | 122,434                         | 4,691      | 127,125 | 172,304                 | 13,670     | 185,974 |
| HR+HER2+ | 5 | 2013 | 101,527                         | 3,217      | 104,745 | 140,201                 | 8,978      | 149,179 |
| HR+HER2+ | 5 | 2014 | 120,788                         | 1,940      | 122,728 | 174,877                 | 4,980      | 179,857 |
| HR+HER2+ | 5 | 2017 | 35,847                          | 627        | 36,474  | 48,835                  | 973        | 49,809  |
| TNBC     | 1 | 2011 | 21,389                          | 10,007     | 31,397  | 36,713                  | 31,684     | 68,397  |

| SG   | Y | YoD  | Societal Perspective (Medicare) |            |         | Payor Perspective (AWP) |            |         |
|------|---|------|---------------------------------|------------|---------|-------------------------|------------|---------|
|      |   |      | Anti-Cancer                     | Supportive | Total   | Anti-Cancer             | Supportive | Total   |
| TNBC | 1 | 2012 | 14,372                          | 9,193      | 23,565  | 29,297                  | 26,444     | 55,742  |
| TNBC | 1 | 2013 | 10,398                          | 9,989      | 20,387  | 22,110                  | 27,686     | 49,796  |
| TNBC | 1 | 2014 | 21,303                          | 11,722     | 33,024  | 35,419                  | 32,489     | 67,908  |
| TNBC | 1 | 2015 | 19,507                          | 9,606      | 29,114  | 33,654                  | 30,016     | 63,670  |
| TNBC | 1 | 2016 | 18,104                          | 7,808      | 25,912  | 35,706                  | 23,348     | 59,054  |
| TNBC | 1 | 2017 | 17,018                          | 8,370      | 25,388  | 30,448                  | 24,998     | 55,446  |
| TNBC | 1 | 2018 | 24,917                          | 7,817      | 32,733  | 40,765                  | 23,754     | 64,519  |
| TNBC | 1 | 2019 | 46,752                          | 7,022      | 53,775  | 65,831                  | 20,073     | 85,904  |
| TNBC | 2 | 2011 | 26,096                          | 3,526      | 29,621  | 45,268                  | 11,114     | 56,382  |
| TNBC | 2 | 2012 | 22,134                          | 6,475      | 28,609  | 32,958                  | 17,162     | 50,119  |
| TNBC | 2 | 2013 | 13,611                          | 8,841      | 22,452  | 25,613                  | 23,600     | 49,213  |
| TNBC | 2 | 2014 | 33,657                          | 9,809      | 43,466  | 47,806                  | 28,784     | 76,590  |
| TNBC | 2 | 2015 | 16,322                          | 6,040      | 22,362  | 30,385                  | 19,064     | 49,449  |
| TNBC | 2 | 2016 | 13,782                          | 7,551      | 21,333  | 26,555                  | 21,851     | 48,406  |
| TNBC | 2 | 2017 | 25,617                          | 4,004      | 29,620  | 39,356                  | 11,327     | 50,683  |
| TNBC | 2 | 2018 | 57,777                          | 8,656      | 66,433  | 77,471                  | 24,981     | 102,452 |
| TNBC | 3 | 2011 | 33,121                          | 1,143      | 34,264  | 58,176                  | 4,079      | 62,255  |
| TNBC | 3 | 2012 | 14,129                          | 6,368      | 20,497  | 26,549                  | 17,103     | 43,652  |
| TNBC | 3 | 2013 | 21,258                          | 3,047      | 24,304  | 37,901                  | 5,579      | 43,480  |
| TNBC | 3 | 2014 | 45,775                          | 9,364      | 55,139  | 64,107                  | 26,338     | 90,444  |
| TNBC | 3 | 2015 | 14,549                          | 3,012      | 17,561  | 40,194                  | 8,072      | 48,266  |
| TNBC | 3 | 2016 | 20,074                          | 10,080     | 30,155  | 35,988                  | 30,909     | 66,897  |
| TNBC | 3 | 2017 | 30,571                          | 8,422      | 38,993  | 60,465                  | 25,596     | 86,061  |
| TNBC | 4 | 2011 | 44,942                          | 857        | 45,799  | 59,855                  | 2,061      | 61,916  |
| TNBC | 4 | 2012 | 15,484                          | 7,252      | 22,735  | 21,328                  | 23,893     | 45,221  |
| TNBC | 4 | 2013 | 45,741                          | 16,784     | 62,526  | 61,693                  | 35,085     | 96,777  |
| TNBC | 4 | 2014 | 52,395                          | 1,195      | 53,590  | 67,836                  | 2,728      | 70,564  |
| TNBC | 4 | 2015 | 15,664                          | 630        | 16,295  | 28,108                  | 1,823      | 29,931  |
| TNBC | 4 | 2017 | 283,781                         | 6,152      | 289,933 | 364,420                 | 14,397     | 378,817 |
| TNBC | 5 | 2011 | 8,259                           | 1,624      | 9,883   | 17,426                  | 5,128      | 22,554  |
| TNBC | 5 | 2012 | 8,465                           | 0          | 8,465   | 14,621                  | 0          | 14,621  |
| TNBC | 5 | 2013 | 43,873                          | 24,617     | 68,490  | 63,622                  | 57,700     | 121,323 |
| TNBC | 5 | 2014 | 136,070                         | 1,162      | 137,232 | 191,827                 | 2,886      | 194,713 |
| TNBC | 5 | 2017 | 167,061                         | 2,467      | 169,528 | 201,826                 | 3,262      | 205,088 |

\*SG= subgroup ,Y=Year,YoD= Year of Diagnosis

**eTable 14.** Overall Survival Statistics for the 4 Subgroups and Overall Sample  
LCL= Lower confidence limit, UCL= upper confidence limit.

| Subgroup        | n     | events | median | 0.95LCL | 0.95UCL | Number deleted due to missingness |
|-----------------|-------|--------|--------|---------|---------|-----------------------------------|
| <b>HR+HER2-</b> | 9,283 | 5,700  | 2.69   | 2.60    | 2.78    | 888                               |
| <b>HR+HER2+</b> | 2,518 | 1,467  | 3.13   | 2.97    | 3.29    | 267                               |
| <b>HR-HER2+</b> | 524   | 433    | 1.74   | 1.54    | 1.95    | 278                               |
| <b>TNBC</b>     | 1,264 | 1,126  | 0.877  | 0.819   | 0.945   | 193                               |

**eFigure.** Overall Survival Analysis Using Kaplan-Meier Curves by Subgroup

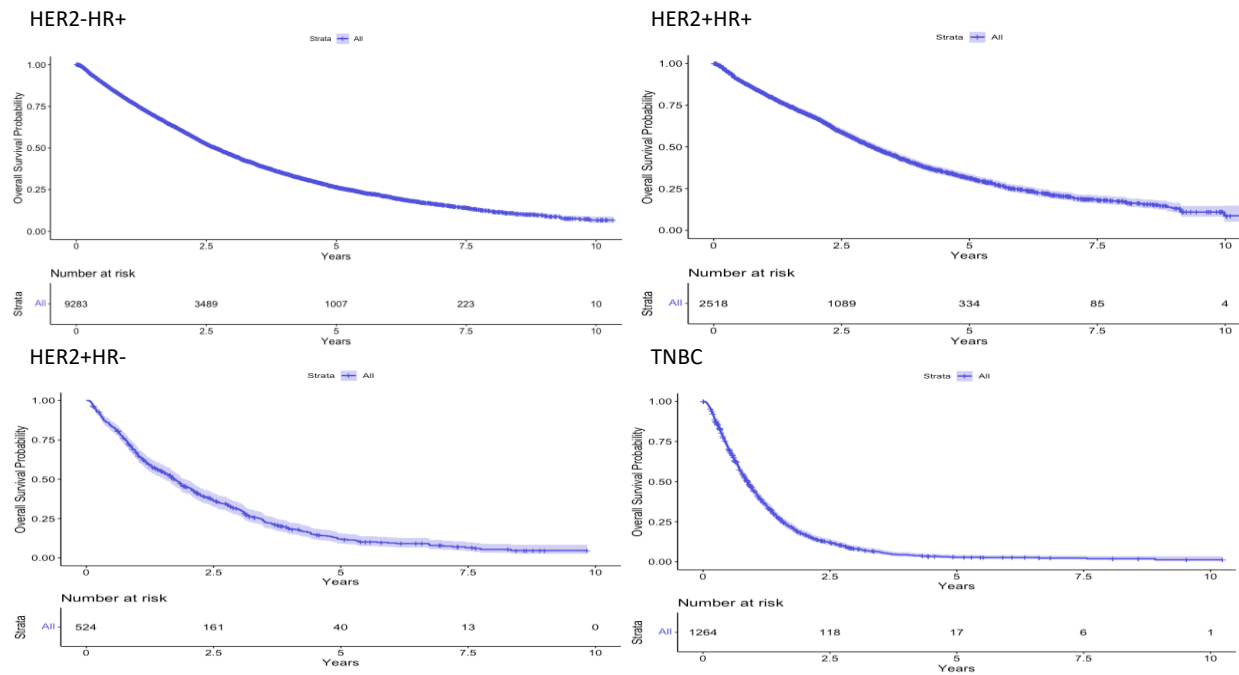

## eReferences

1. Taskindoust M, Thomas SM, Sammons SL, et al. Survival Outcomes Among Patients with Metastatic Breast Cancer: Review of 47,000 Patients. *Ann Surg Oncol*. 2021;28(12):7441-7449.
2. Gobbin E, Ezzalfani M, Dieras V, et al. Time trends of overall survival among metastatic breast cancer patients in the real-life ESME cohort. *Eur J Cancer*. 2018;96:17-24.
3. Zhang L, Li Z, Zhang J, Wu Y, Zhu Y, Tong Z. De novo metastatic breast cancer: Subgroup analysis of molecular subtypes and prognosis. *Oncol Lett*. 2020;19(4):2884-2894.
4. Bartmann C, Wischnewsky M, Stuber T, et al. Pattern of metastatic spread and subcategories of breast cancer. *Arch Gynecol Obstet*. 2017;295(1):211-223.
5. Savci-Heijink CD, Halfwerk H, Hooijer GK, Horlings HM, Wesseling J, van de Vijver MJ. Retrospective analysis of metastatic behaviour of breast cancer subtypes. *Breast Cancer Res Treat*. 2015;150(3):547-557.
6. Wong CR, Njei B, Nguyen MH, Nguyen A, Lim JK. Survival after treatment with curative intent for hepatocellular carcinoma among patients with vs without non-alcoholic fatty liver disease. *Aliment Pharmacol Ther*. 2017;46(11-12):1061-1069.
7. Sundquist M, Brudin L, Tejler G. Improved survival in metastatic breast cancer 1985-2016. *Breast*. 2017;31:46-50.
