# Supplementary material for: Treatment Sequencing Patterns and Associated Direct Medical Costs of Metastatic Breast Cancer Care in the United States, 2011 to 2021
Source: PubMed Central journal article supplement (PMC9709649; doi:10.1001/jamanetworkopen.2022.44204), 2022-11-29
Supplement: jamanetwopen-e2244204-s002.pdf [file jamanetwopen-e2244204-s002.pdf]

## Data Sharing Statement

Jaber Chehayeb. Treatment Sequencing Patterns and Associated Direct Medical Costs of Metastatic Breast Cancer Care in the United States, 2011 to 2021. *JAMA Netw Open*. Published November 29, 2022. doi:10.1001/jamanetworkopen.2022.44204

### Data

**Data available:** No

### Additional Information

**Explanation for why data not available:** The data that support the findings of this study have been originated by Flatiron Health, Inc. De-identified data used in this analysis may be made available upon request and are subject to a license agreement with Flatiron Health; interested researchers should contact <[DataAccess@flatiron.com](mailto:DataAccess@flatiron.com)> to determine licensing terms.
